# Supplementary material
Source: publisher figshare collection journal article supplement (https://gsajournals.figshare.com/ndownloader/files/14645216)
Supplement: Supplementary file 1 [file 14645216]

## Sheet: U_Wisc_Yeast_v1-2_Manifest(2)
Table S2. PCR primer pairs present in each well of the yeast spliceosome custom targeted sequencing panel. From Illumina, Inc.
Gene	Target ID	Species	Build ID	Chromosome	Start Position	End Position	Strand	ULSO Sequence	DLSO Sequence	Probe Strand
PRP45	YAL032C.line.1.chrI.83335.84474_tile_1	Saccharomyces cerevisiae	R64-2-1	chrI	83335	84474	-	AGATACCACAACGGGACTCCGCAGAC	CCCAGGATGAGCACTAGGAAAACAAAG	-
PRP45	YAL032C.line.1.chrI.83335.84474_tile_2	Saccharomyces cerevisiae	R64-2-1	chrI	83335	84474	+	TTGCTTTTTGGGCTTAACTATTGCTCC	GAACCTTGGCAACAATGGATCCATTTG	+
PRP45	YAL032C.line.1.chrI.83335.84474_tile_3	Saccharomyces cerevisiae	R64-2-1	chrI	83335	84474	-	TCAGCAACCTCAACCAAATATGTTTAG	TTGGGAAGAAGGCGAGAAAGGTTGTAG	-
PRP45	YAL032C.line.1.chrI.83335.84474_tile_4	Saccharomyces cerevisiae	R64-2-1	chrI	83335	84474	+	AGAATGTTTTGGAGGTGGTAGTCTGTT	CAGATTCGCCATTTTCCCACTCTAATC	+
AAR2	YBL074C.line.2.chrII.86722.87789_tile_1	Saccharomyces cerevisiae	R64-2-1	chrII	86722	87789	-	TTTTGGTAACTACGGGTCGAGTTTGC	ATCATCGTGCGGCGCTATCATCAAACGT	-
AAR2	YBL074C.line.2.chrII.86722.87789_tile_2	Saccharomyces cerevisiae	R64-2-1	chrII	86722	87789	+	CATATCAGTTCGATCATAGCATGCCAT	AGATTGTACCAGGTATCATCTTCGTCA	+
AAR2	YBL074C.line.2.chrII.86722.87789_tile_3	Saccharomyces cerevisiae	R64-2-1	chrII	86722	87789	-	GAATGGACACCAAAGATCCTCCTTATC	ACCGAGTTTGTGCAGATGGATAAAATC	-
LSM2	YBL026W.line.3.chrII.170623.171038_tile_1	Saccharomyces cerevisiae	R64-2-1	chrII	170623	171038	-	TTCTTTCAGTCATTACCTCCCTTCTGG	TTGCTAGGGTGTTATCAGCGTGAGAT	-
LSM2	YBL026W.line.3.chrII.170623.171038_tile_2	Saccharomyces cerevisiae	R64-2-1	chrII	170623	171038	+	GTAGATACGAATTTGCTACAAGACGCT	GTCATGAAATGCAGATCAACACTCCAA	+
PRP6	YBR055C.line.4.chrII.344602.347301_tile_1	Saccharomyces cerevisiae	R64-2-1	chrII	344602	347301	-	CAGGCATTGCAAAAGTTTCCAAGCAAT	GTAATTCTATCTTGCGTTGTTTTCTACTT	-
PRP6	YBR055C.line.4.chrII.344602.347301_tile_2	Saccharomyces cerevisiae	R64-2-1	chrII	344602	347301	+	GCTTGATTTGCTCCACCCAAAGTAAAG	CAGATCTTGGTACCGCAGAAAGTTTAC	+
PRP6	YBR055C.line.4.chrII.344602.347301_tile_3	Saccharomyces cerevisiae	R64-2-1	chrII	344602	347301	-	GTGATACAGTTCTTTGGTCTAGACTGA	ATGAAGAGGCTATAAAATTCTTGAATGAG	-
PRP6	YBR055C.line.4.chrII.344602.347301_tile_4	Saccharomyces cerevisiae	R64-2-1	chrII	344602	347301	+	ATTTTATGGTAGCTTTCAGTGGCCATT	GAGATAATCCAAATTTCCGGTTCTTGCG	+
PRP6	YBR055C.line.4.chrII.344602.347301_tile_5	Saccharomyces cerevisiae	R64-2-1	chrII	344602	347301	-	ACATTAGACTACACGAATCTGATGTTC	ACACTCTTGGAAGAACGAAATAACCCA	-
PRP6	YBR055C.line.4.chrII.344602.347301_tile_6	Saccharomyces cerevisiae	R64-2-1	chrII	344602	347301	+	GCCGTTGCCACTAATGTTTTACAGTAG	TGCAATAATTTTTCTCGTTCTTCCGTT	+
PRP6	YBR055C.line.4.chrII.344602.347301_tile_7	Saccharomyces cerevisiae	R64-2-1	chrII	344602	347301	-	GACAAAGGAAGAAGAATACCGAAAAGG	TCTCAAATAGATGAGAATCTTGCACAA	-
PRP6	YBR055C.line.4.chrII.344602.347301_tile_8	Saccharomyces cerevisiae	R64-2-1	chrII	344602	347301	+	GAAGATGGTTGTTCAAATTTTCACGGT	GGAGGAGCTACTAAAGAAAGAGTGCTG	+
ECM2	YBR065C.line.5.chrII.368584.369678_tile_1	Saccharomyces cerevisiae	R64-2-1	chrII	368584	369678	-	TGTCATTAATAGTCAACCACAAGGCGA	GAAACGTAAGAAAAATCATGGGTTGAAG	-
ECM2	YBR065C.line.5.chrII.368584.369678_tile_2	Saccharomyces cerevisiae	R64-2-1	chrII	368584	369678	+	CTAGATTGAAATCTTAGGCCACCACAC	TCACTCGTAATCTGAGCTCCTCCTAA	+
ECM2	YBR065C.line.5.chrII.368584.369678_tile_3	Saccharomyces cerevisiae	R64-2-1	chrII	368584	369678	-	GATGAAATTAATGAGCCACCGCCCAAT	CCGTCAGAAGCAGATAATATCGTTGAT	-
ECM2	YBR065C.line.5.chrII.368584.369678_tile_4	Saccharomyces cerevisiae	R64-2-1	chrII	368584	369678	+	CCTCATCACCTAAGCACTGCTCACATA	ATGTTTTTGGCTGAGCTCACTCACATC	+
EXO84	YBR102C.line.6.chrII.445062.447323_tile_1	Saccharomyces cerevisiae	R64-2-1	chrII	445062	447323	-	AATATGATTAAGTTAGGATTACCAGAGCA	CAAGATCACAGAAAATAAACCTCACTT	-
EXO84	YBR102C.line.6.chrII.445062.447323_tile_2	Saccharomyces cerevisiae	R64-2-1	chrII	445062	447323	+	GATCTATTCTGTAAGAATAGGTCAAGAGC	TCTGCAAAAGATATTGATCCATTGCGC	+
EXO84	YBR102C.line.6.chrII.445062.447323_tile_3	Saccharomyces cerevisiae	R64-2-1	chrII	445062	447323	-	TCGCCGATAAATCAAGAGATAAGCAAA	CCTAACTCTATCAATGCATTCGAGGCC	-
EXO84	YBR102C.line.6.chrII.445062.447323_tile_4	Saccharomyces cerevisiae	R64-2-1	chrII	445062	447323	+	GGATAGCACTGGCTTACTATAAAGTCA	TTTTTCAGCTATTTTGGTGCACTGATCC	+
EXO84	YBR102C.line.6.chrII.445062.447323_tile_5	Saccharomyces cerevisiae	R64-2-1	chrII	445062	447323	-	AATCTTTCAACTGCCGATCTCTCCCTG	GGTTACAATTGCAGGATCAAATAGATC	-
EXO84	YBR102C.line.6.chrII.445062.447323_tile_6	Saccharomyces cerevisiae	R64-2-1	chrII	445062	447323	+	CAGGCACCTTATTATAGGAGCTGTCGT	TTTACATGCTTCCAATTGTTTCTGGCC	+
EXO84	YBR102C.line.6.chrII.445062.447323_tile_7	Saccharomyces cerevisiae	R64-2-1	chrII	445062	447323	-	GTTGTTAGTGTGGGCTGTACACTTCTT	AAGTCTGCAAGCTCTCCTGCTAAGCAA	-
MUD1	YBR119W.line.7.chrII.479338.480323_tile_1	Saccharomyces cerevisiae	R64-2-1	chrII	479338	480323	-	GTTGTCGTGTATTTTTCTAGAAACCGG	GTTTCTTTAGGTTTGATGAGGCCGTCT	-
MUD1	YBR119W.line.7.chrII.479338.480323_tile_2	Saccharomyces cerevisiae	R64-2-1	chrII	479338	480323	+	TAACGTTTGTCACTCAAGAAGAAGCAG	ACAATGGAAAATCCACCGAACAAAGTC	+
MUD1	YBR119W.line.7.chrII.479338.480323_tile_3	Saccharomyces cerevisiae	R64-2-1	chrII	479338	480323	-	CGTTGACGGTAAGAAAAAGGAAAGCTT	TTGGACACTTTAGCCCGCTTAAGAGGT	-
SPP381	YBR152W.line.8.chrII.546376.547251_tile_1	Saccharomyces cerevisiae	R64-2-1	chrII	546376	547251	-	ATCTTGGGCATTCCAGGGTTGATCTA	AATTCTTAATCTAGCGGTGGCGGTAG	-
SPP381	YBR152W.line.8.chrII.546376.547251_tile_2	Saccharomyces cerevisiae	R64-2-1	chrII	546376	547251	+	GCCAATAATTTGCAGAAAGCTACCAAG	CGTTATCTTGGACAAGGAGAAAGAGAA	+
SPP381	YBR152W.line.8.chrII.546376.547251_tile_3	Saccharomyces cerevisiae	R64-2-1	chrII	546376	547251	-	TCACACAGTGGTGTCAAAGACATATCT	CGTATTTGGTATTCCCATCTTTGCCTT	-
NTC20	YBR188C.line.9.chrII.603685.604107_tile_1	Saccharomyces cerevisiae	R64-2-1	chrII	603685	604107	-	GCCCTCTCTGCGAGATTTATCACTAGA	GGATAATTACAACCAATTGCGTGCGC	-
NTC20	YBR188C.line.9.chrII.603685.604107_tile_2	Saccharomyces cerevisiae	R64-2-1	chrII	603685	604107	+	ACGTAACTGATTTAATTCTTGGTCCCT	GACAAGAAAGAAAGCAACAAGACAACT	+
U2	LSR1.line.10.chrII.680688.681862_tile_1	Saccharomyces cerevisiae	R64-2-1	chrII	680688	681862	-	TTTCTCATTGAGGAGAAGGAGCTCTTC	TTTTCCTTTGACTTCGCATGAATGAGT	-
U2	LSR1.line.10.chrII.680688.681862_tile_2	Saccharomyces cerevisiae	R64-2-1	chrII	680688	681862	+	TTAGCAAACCTCCATTTATATCCTGCG	CCCATCGATAAAGAAAAACCAAATCCCG	+
U2	LSR1.line.10.chrII.680688.681862_tile_3	Saccharomyces cerevisiae	R64-2-1	chrII	680688	681862	-	CTGTTCTTTTCAGTGTAACAACTGAAA	AGAAATGGTGCTATAGTAGGTTGGGAG	-
U2	LSR1.line.10.chrII.680688.681862_tile_4	Saccharomyces cerevisiae	R64-2-1	chrII	680688	681862	+	TAAAAGGTAATGAGCCTCATTGAGGTC	TTTGTCTATGAAGCTTCGCTATCCTGC	+
PRP5	YBR237W.line.11.chrII.691969.694518_tile_1	Saccharomyces cerevisiae	R64-2-1	chrII	691969	694518	-	TCATTATCATGCTCTGGAGCTTTTTGA	CTCAAATAAACCCAAGGCAACAGCGT	-
PRP5	YBR237W.line.11.chrII.691969.694518_tile_2	Saccharomyces cerevisiae	R64-2-1	chrII	691969	694518	+	GAGTTTCTTTTAGATCGAAGGAGCACA	ATATCAAAATAAAGGGAACAGGTTGCCC	+
PRP5	YBR237W.line.11.chrII.691969.694518_tile_3	Saccharomyces cerevisiae	R64-2-1	chrII	691969	694518	-	TCATTTCAGAACCTCCTGTACAGCAT	ATCCAGACTAAGTCTAAGCTCCTCAAC	-
PRP5	YBR237W.line.11.chrII.691969.694518_tile_4	Saccharomyces cerevisiae	R64-2-1	chrII	691969	694518	+	CAGAAGCAGATACATCCATTAGATCAG	GAAAAATTTGACAATCTGGTGCAGCTT	+
PRP5	YBR237W.line.11.chrII.691969.694518_tile_5	Saccharomyces cerevisiae	R64-2-1	chrII	691969	694518	-	CTACCTCTGGCAGTTCTTCCAGTAGTA	TCTTCTGAATGGCATATTCTAAACTTTTG	-
PRP5	YBR237W.line.11.chrII.691969.694518_tile_6	Saccharomyces cerevisiae	R64-2-1	chrII	691969	694518	+	CCGTCAAAACTTTCGCGCAATATGTTC	ACTATTCAAAGAGTCTACAGACGGGTC	+
PRP5	YBR237W.line.11.chrII.691969.694518_tile_7	Saccharomyces cerevisiae	R64-2-1	chrII	691969	694518	-	AACTACGAAAGTATATAGCACCACGAG	CATAATTGAGTCTCGGAATAAGCGCAG	-
BUD31	YCR063W.line.12.chrIII.228318.228791_tile_1	Saccharomyces cerevisiae	R64-2-1	chrIII	228318	228791	-	TTCCTCTAACTGTGCACGAGGCACCCT	CGTTTTGTGAGGTGAGCTTTGCTAGT	-
BUD31	YCR063W.line.12.chrIII.228318.228791_tile_2	Saccharomyces cerevisiae	R64-2-1	chrIII	228318	228791	+	AACTAACAACGGTAGCACTTGCATCTG	AATTACTTCTTCTCCTCCCTTACGGTG	+
CWC2	YDL209C.line.13.chrIV.86207.87226_tile_1	Saccharomyces cerevisiae	R64-2-1	chrIV	86207	87226	-	ACCCAGCGATAAAGAATGGGATGATAG	GAAGAAAATCGTTTCCACCAAATTCTAAG	-
CWC2	YDL209C.line.13.chrIV.86207.87226_tile_2	Saccharomyces cerevisiae	R64-2-1	chrIV	86207	87226	+	TTTCACCAATAGTCCAGTACCCTCCCT	TATTCACATTTAGGGCCAAGGCAACAC	+
CWC2	YDL209C.line.13.chrIV.86207.87226_tile_3	Saccharomyces cerevisiae	R64-2-1	chrIV	86207	87226	-	CATCGTTACATACGTACATATGCGGGT	CTGCATCATATACCAGACGAAGAAGAT	-
SNU23	YDL098C.line.14.chrIV.284581.285165_tile_1	Saccharomyces cerevisiae	R64-2-1	chrIV	284581	285165	-	ACAGCAAATACAGAGAGCTTATCGTCT	AACCAAGTAAAGATAAATGAGCATAATACA	-
SNU23	YDL098C.line.14.chrIV.284581.285165_tile_2	Saccharomyces cerevisiae	R64-2-1	chrIV	284581	285165	+	AAAATCCGAACTTCTTTCCCCTCTTGA	AGGAATTCTTACTCTGGTACTTGTGAG	+
LUC7	YDL087C.line.15.chrIV.300214.300999_tile_1	Saccharomyces cerevisiae	R64-2-1	chrIV	300214	300999	-	GATAGGCCTAATGGGACAAGAGATTGA	TGATGCTAGAAAAATTTTGTTCGAAGG	-
LUC7	YDL087C.line.15.chrIV.300214.300999_tile_2	Saccharomyces cerevisiae	R64-2-1	chrIV	300214	300999	+	ACTGACTTCATCTGCACGAATTAAAGA	TGATGCGAATACCTGTTGTGGCGGAAA	+
LUC7	YDL087C.line.15.chrIV.300214.300999_tile_3	Saccharomyces cerevisiae	R64-2-1	chrIV	300214	300999	-	CTGATCTTCACAAAGCATCCAGCAAAG	AAAAGAGACCTCGGACTACACGATCCCAA	-
SUB2	YDL084W.line.16.chrIV.305237.306577_tile_1	Saccharomyces cerevisiae	R64-2-1	chrIV	305237	306577	-	GCTGTCTTACCTAAACCAGACTTTGCT	AGTAACGTAAAATTCCAACAGGCAAAC	-
SUB2	YDL084W.line.16.chrIV.305237.306577_tile_2	Saccharomyces cerevisiae	R64-2-1	chrIV	305237	306577	+	CAATTCATGGTACCGATGTCTTGTGTC	ACTCCAAGAGACAAACAAGTCATGATG	+
SUB2	YDL084W.line.16.chrIV.305237.306577_tile_3	Saccharomyces cerevisiae	R64-2-1	chrIV	305237	306577	-	CGTTCAATATCGATACCTCTACCAAAA	GCTCTGAAAATTTCTTGCACATCTCTT	-
SUB2	YDL084W.line.16.chrIV.305237.306577_tile_4	Saccharomyces cerevisiae	R64-2-1	chrIV	305237	306577	+	AAAAACGTATTTGCGTGTCCACAGATG	TCATTTCGTGAACGCACAAGACAATTC	+
YDL051W	YDL051W.line.17.chrIV.363952.364779_tile_1	Saccharomyces cerevisiae	R64-2-1	chrIV	363952	364779	-	CGTCCTCATGTGGGAAATTCATTACAG	ACTTCTTTGCAGATGCTACTTTAGTTC	-
YDL051W	YDL051W.line.17.chrIV.363952.364779_tile_2	Saccharomyces cerevisiae	R64-2-1	chrIV	363952	364779	+	AGAATTGAGCAAAACCAACGGACTTTG	AGGAAGAGTCAAAAGAGGACTCTTCTG	+
YDL051W	YDL051W.line.17.chrIV.363952.364779_tile_3	Saccharomyces cerevisiae	R64-2-1	chrIV	363952	364779	-	GAGACTCTCTCTGACTGCAAGAAAAGT	GCCGTTTTTCTTCTTATTTTTGGGGAA	-
PRP11	YDL043C.line.18.chrIV.375680.376480_tile_1	Saccharomyces cerevisiae	R64-2-1	chrIV	375680	376480	-	ACGGTACGATCCCTGTTTGTAAAATAG	GTATTATTTTTGGGTAACGTTAATAATCGG	-
PRP11	YDL043C.line.18.chrIV.375680.376480_tile_2	Saccharomyces cerevisiae	R64-2-1	chrIV	375680	376480	+	GAACCGTTCTTCGGGTTTTTCACGGTA	TTTGACCCAACGCCTTCTAAATAGTTC	+
PRP11	YDL043C.line.18.chrIV.375680.376480_tile_3	Saccharomyces cerevisiae	R64-2-1	chrIV	375680	376480	-	GACGATTCCGCATAAGAAATGGAACGA	AAAGGAGGTGGTGGTATAGCCTCAGAA	-
PRP9	YDL030W.line.19.chrIV.397537.399129_tile_1	Saccharomyces cerevisiae	R64-2-1	chrIV	397537	399129	-	AGAGTTGATATCCAATTCAAAGTTCTCA	GAGATGATGCCCTCCTACTCCTATTAA	-
PRP9	YDL030W.line.19.chrIV.397537.399129_tile_2	Saccharomyces cerevisiae	R64-2-1	chrIV	397537	399129	+	AGCTAGAGAAGGAACTGAAAAATGAAG	CTAATCAAATCTGACTTCGAACATTCA	+
PRP9	YDL030W.line.19.chrIV.397537.399129_tile_3	Saccharomyces cerevisiae	R64-2-1	chrIV	397537	399129	-	GGCATGTCAAACGATTTACCAGAGAG	TTTTCAACTGCCGCAGCGTCAAGCAAA	-
PRP9	YDL030W.line.19.chrIV.397537.399129_tile_4	Saccharomyces cerevisiae	R64-2-1	chrIV	397537	399129	+	GAGAGATGGTCAACTGCAAGAAGAGCA	AGAAGGTCTACGATGAACTTAAGAAGC	+
PRP9	YDL030W.line.19.chrIV.397537.399129_tile_5	Saccharomyces cerevisiae	R64-2-1	chrIV	397537	399129	-	GAAACCAGTACCCTGATCAAGGACTAT	ACTCATTACATTTCCTTCTTCGTCTTC	-
SLU7	YDR088C.line.20.chrIV.618497.619645_tile_1	Saccharomyces cerevisiae	R64-2-1	chrIV	618497	619645	-	CGAGATTGAGAGAAGATAAGGCTGCTT	ATCATTTGAATTTCCAATATCCTAGTCAC	-
SLU7	YDR088C.line.20.chrIV.618497.619645_tile_2	Saccharomyces cerevisiae	R64-2-1	chrIV	618497	619645	+	CTCTCCGTTGAATTTATGTCGTTCAAG	CTGCTTCCCCACAATTCCTACAAAATG	+
SLU7	YDR088C.line.20.chrIV.618497.619645_tile_3	Saccharomyces cerevisiae	R64-2-1	chrIV	618497	619645	-	ACCAGTTACACTGAAATACAACGATCG	GCATAAGGAGAAAGACTGCATGGAAAA	-
CWC15	YDR163W.line.21.chrIV.781423.781950_tile_1	Saccharomyces cerevisiae	R64-2-1	chrIV	781423	781950	-	CGCCTAGACGAATTTCCTCCCTTTAA	GTCTTGTAGCCCTTTCAAATGCCAG	-
CWC15	YDR163W.line.21.chrIV.781423.781950_tile_2	Saccharomyces cerevisiae	R64-2-1	chrIV	781423	781950	+	TAAAGCAGAGCTTGAAGGAAATGAACA	CCAGACTTAGGACTATTGTCTTGGCTT	+
PRP42	YDR235W.line.22.chrIV.933504.935138_tile_1	Saccharomyces cerevisiae	R64-2-1	chrIV	933504	935138	-	CAACATATTCTTCAGCTGTTTCATATTTTT	GATGTTTGCTACTTCAGTTAATGGTCA	-
PRP42	YDR235W.line.22.chrIV.933504.935138_tile_2	Saccharomyces cerevisiae	R64-2-1	chrIV	933504	935138	+	ACGTTATCTCACACCAGAAGCAGTTG	TGGTTGTACAATATCAAGTACTTGAAATC	+
PRP42	YDR235W.line.22.chrIV.933504.935138_tile_3	Saccharomyces cerevisiae	R64-2-1	chrIV	933504	935138	-	CATTGTCGGAATATGAGGACTCAATTT	GTACATTTCCTTCGTTATTTTCTTCAACT	-
PRP42	YDR235W.line.22.chrIV.933504.935138_tile_4	Saccharomyces cerevisiae	R64-2-1	chrIV	933504	935138	+	TACGTACTTTTGCGAAATCTATTGGAA	ATATTGTCAGAAAAATATGGCCCCAAA	+
PRP42	YDR235W.line.22.chrIV.933504.935138_tile_5	Saccharomyces cerevisiae	R64-2-1	chrIV	933504	935138	-	GGGCCAGGGTCAAGTTCAATATTTTAG	TTGCCTCTTGTCCAAATATGACCTAGA	-
SNU56	YDR240C.line.23.chrIV.943674.945152_tile_1	Saccharomyces cerevisiae	R64-2-1	chrIV	943674	945152	-	AACTTTTGAGGACGGAAGGTATAGTGA	CGCATATAACAGTGGAGGTGTATAGATATA	-
SNU56	YDR240C.line.23.chrIV.943674.945152_tile_2	Saccharomyces cerevisiae	R64-2-1	chrIV	943674	945152	+	CTGCGTCATAAAACCCGGTTTATTACC	CAAGTGATATCTGTGAATAAGTGCGGT	+
SNU56	YDR240C.line.23.chrIV.943674.945152_tile_3	Saccharomyces cerevisiae	R64-2-1	chrIV	943674	945152	-	GGACTCTTGCTTCGTATTATCAGTTCT	CCTCTACGAACTTCCATTAATTGGCGA	-
SNU56	YDR240C.line.23.chrIV.943674.945152_tile_4	Saccharomyces cerevisiae	R64-2-1	chrIV	943674	945152	+	CATCCATAATCGCTTCTGGAAAGCAAG	CGGCTTGGTATGATGATACGCTAATCC	+
SNU56	YDR240C.line.23.chrIV.943674.945152_tile_5	Saccharomyces cerevisiae	R64-2-1	chrIV	943674	945152	-	CATGAGTTGTTGCATTTCCTCTTCCAT	AGGGACAACTTTCACAAGGACATTATC	-
PRP28	YDR243C.line.24.chrIV.948518.950284_tile_1	Saccharomyces cerevisiae	R64-2-1	chrIV	948518	950284	-	AACCAACATGAAGGTGACGATTTTACA	TTTTGATGGACCCAAGATCTCAACTTT	-
PRP28	YDR243C.line.24.chrIV.948518.950284_tile_2	Saccharomyces cerevisiae	R64-2-1	chrIV	948518	950284	+	TTCCCTTTGCTCTTGCGATTTAGAACC	AATCAATCATTTTGTCAGCTTCATCTAG	+
PRP28	YDR243C.line.24.chrIV.948518.950284_tile_3	Saccharomyces cerevisiae	R64-2-1	chrIV	948518	950284	-	GTTCGGGTAAGACTTTGGCCTTTGTAA	AGGTTTTGAGGACCAAGTAACAAACAT	-
PRP28	YDR243C.line.24.chrIV.948518.950284_tile_4	Saccharomyces cerevisiae	R64-2-1	chrIV	948518	950284	+	GACCTACTCATCTTGATTAGTATCGGT	ATAGCTCTAGTTGAAACGATAGGATCA	+
PRP28	YDR243C.line.24.chrIV.948518.950284_tile_5	Saccharomyces cerevisiae	R64-2-1	chrIV	948518	950284	-	CGAAAAGGTCAATAGGAGCCGAAGAAT	GATTTGCTATGGAAGGGAAAGACTCCT	-
CDC40	YDR364C.line.25.chrIV.1202843.1204210_tile_1	Saccharomyces cerevisiae	R64-2-1	chrIV	1202843	1204210	-	TTTGGGAAAATCAGATCAATGTACCAA	TTCACTCGGAATGTTACTTGAAACAAA	-
CDC40	YDR364C.line.25.chrIV.1202843.1204210_tile_2	Saccharomyces cerevisiae	R64-2-1	chrIV	1202843	1204210	+	TGTTGAGCCGTGTCACTTATTTGTTTT	GTTATGACCTTGAAAATCTCGTAGGCA	+
CDC40	YDR364C.line.25.chrIV.1202843.1204210_tile_3	Saccharomyces cerevisiae	R64-2-1	chrIV	1202843	1204210	-	CAAGTAGTGACGATGAAACTTCACAAG	AGCCTATTAAAGCATTACGATTCACCG	-
CDC40	YDR364C.line.25.chrIV.1202843.1204210_tile_4	Saccharomyces cerevisiae	R64-2-1	chrIV	1202843	1204210	+	TCCTGATCTTCTTTCTGAGTTTCGCTG	ACAGTACTCCCTCGTAAATAAGACAAA	+
LSM6	YDR378C.line.26.chrIV.1229349.1229609_tile_1	Saccharomyces cerevisiae	R64-2-1	chrIV	1229349	1229609	-	GTGTACAATGCCAAATAAGCAACGTCG	CTCCTCTAATGGATTAATATGTAGGAATGA	-
SYF1	YDR416W.line.27.chrIV.1298432.1301011_tile_1	Saccharomyces cerevisiae	R64-2-1	chrIV	1298432	1301011	-	CATTAAAGATGAAGCTAAGGCATGCCT	GGATATATGGACACAATAAGTTTTGCG	-
SYF1	YDR416W.line.27.chrIV.1298432.1301011_tile_2	Saccharomyces cerevisiae	R64-2-1	chrIV	1298432	1301011	+	AATTGAACAATATGACTTGGCAATGAT	ATCTACCTAGTTCAGAACTGCCTTTTG	+
SYF1	YDR416W.line.27.chrIV.1298432.1301011_tile_3	Saccharomyces cerevisiae	R64-2-1	chrIV	1298432	1301011	-	AGTTGATTAAAGATTCAAATGTCGCCA	CTTCCCACTATTTTCATCTTGTGGCAA	-
SYF1	YDR416W.line.27.chrIV.1298432.1301011_tile_4	Saccharomyces cerevisiae	R64-2-1	chrIV	1298432	1301011	+	GATTGGACTGAAAAGTTACAAGCTCAT	AGATGCATTACATGTGCCAACAAATCC	+
SYF1	YDR416W.line.27.chrIV.1298432.1301011_tile_5	Saccharomyces cerevisiae	R64-2-1	chrIV	1298432	1301011	-	ATGTTCAGGACTCAGTGATGACAATTG	CAAGGATAGAAAAAGCTCTTTCCACCC	-
SYF1	YDR416W.line.27.chrIV.1298432.1301011_tile_6	Saccharomyces cerevisiae	R64-2-1	chrIV	1298432	1301011	+	TGAGTATCTAGAAGTAGCGACATCACA	AACTATTCGAGCACGTGAAATCCTTGC	+
SYF1	YDR416W.line.27.chrIV.1298432.1301011_tile_7	Saccharomyces cerevisiae	R64-2-1	chrIV	1298432	1301011	-	GTGCACGGATGTTTGAAGGAAAATTGC	CTCCTATAGAGCTCTCGAAATCTGAAA	-
SPP41	YDR464W.line.28.chrIV.1388872.1393179_tile_1	Saccharomyces cerevisiae	R64-2-1	chrIV	1388872	1393179	-	CTGTAAGATATGAGCCCATTCTTGCTG	ATGATATATGGTTAACACCTTACTGTTTTT	-
SPP41	YDR464W.line.28.chrIV.1388872.1393179_tile_2	Saccharomyces cerevisiae	R64-2-1	chrIV	1388872	1393179	+	AGCGGATGATAATCACGAAAAAGAACA	AAGCATGCCAAAGACCGTAATAAAGAA	+
SPP41	YDR464W.line.28.chrIV.1388872.1393179_tile_3	Saccharomyces cerevisiae	R64-2-1	chrIV	1388872	1393179	-	CTTGAGGAGGCCTCTTTTTCGGTTTAA	TTGGAATGGCTCGAAGATTTACTCTTC	-
SPP41	YDR464W.line.28.chrIV.1388872.1393179_tile_4	Saccharomyces cerevisiae	R64-2-1	chrIV	1388872	1393179	+	GATATTCCATTGGCTATGTTACAGGCT	ACTTGAATCAAATCATGCAAAACGCAA	+
SPP41	YDR464W.line.28.chrIV.1388872.1393179_tile_5	Saccharomyces cerevisiae	R64-2-1	chrIV	1388872	1393179	-	CCATCTTTTCTTTCTAGCCACAGATGCA	AAGCGAGTCATCATTAGCTGTGCTTGC	-
SPP41	YDR464W.line.28.chrIV.1388872.1393179_tile_6	Saccharomyces cerevisiae	R64-2-1	chrIV	1388872	1393179	+	AAAAATACGTCTCTATTGCCAACGAGG	ATTCCTCTCTTCAACTTTGTAAAGGGT	+
SPP41	YDR464W.line.28.chrIV.1388872.1393179_tile_7	Saccharomyces cerevisiae	R64-2-1	chrIV	1388872	1393179	-	ATGGCCGGTAAAATTCTGTTCCTAGTA	TTCTTCAAAGCAGATGAAGGTACCTTC	-
SPP41	YDR464W.line.28.chrIV.1388872.1393179_tile_8	Saccharomyces cerevisiae	R64-2-1	chrIV	1388872	1393179	+	TTCGTGTCTCCAAAGAAGGTACGGCAA	GCCCGATCCCCACTCTAATTCTACAAT	+
SPP41	YDR464W.line.28.chrIV.1388872.1393179_tile_9	Saccharomyces cerevisiae	R64-2-1	chrIV	1388872	1393179	-	CAGGCTCGCATCTTCATTCAAATCTGT	TGGCTTTATCAGGGGATTCAGAGCT	-
SPP41	YDR464W.line.28.chrIV.1388872.1393179_tile_10	Saccharomyces cerevisiae	R64-2-1	chrIV	1388872	1393179	+	TAAAAAGAAGCCAGGTGAGAAAATTGC	TCACAGCCACTGATGTTAAAAACTACC	+
SPP41	YDR464W.line.28.chrIV.1388872.1393179_tile_11	Saccharomyces cerevisiae	R64-2-1	chrIV	1388872	1393179	-	TCTTGGTGGAGTTCATCTCTCTCCATC	TTCGGGCAGAATATTAGTGATAGTAGA	-
SPP41	YDR464W.line.28.chrIV.1388872.1393179_tile_12	Saccharomyces cerevisiae	R64-2-1	chrIV	1388872	1393179	+	AGAAGGAGATTAACAATGTGAGGAAACGG	AGAAAAGCATTTTACACTGAGGTGTTAC	+
SPP41	YDR464W.line.28.chrIV.1388872.1393179_tile_13	Saccharomyces cerevisiae	R64-2-1	chrIV	1388872	1393179	-	CTCATTTTTCAACGGATTAGGCGCTGA	TCTCTTCTTCTTTGGTTGTAAAGAGGC	-
PRP3	YDR473C.line.29.chrIV.1404445.1405854_tile_1	Saccharomyces cerevisiae	R64-2-1	chrIV	1404445	1405854	-	CGTTGAAAAGCCGACAGTATACCATTG	ATCGGTGTCTACAAAATGATACGCTTT	-
PRP3	YDR473C.line.29.chrIV.1404445.1405854_tile_2	Saccharomyces cerevisiae	R64-2-1	chrIV	1404445	1405854	+	CTGTAAGTTTTTGAACTGGAACACCTT	TATAGATGGGTGCTCATCATCATCATC	+
PRP3	YDR473C.line.29.chrIV.1404445.1405854_tile_3	Saccharomyces cerevisiae	R64-2-1	chrIV	1404445	1405854	-	CGAGCAGATTTAACAGGCGTTATGAAC	GATATGTAGCACATCCCTTACCTGAAA	-
PRP3	YDR473C.line.29.chrIV.1404445.1405854_tile_4	Saccharomyces cerevisiae	R64-2-1	chrIV	1404445	1405854	+	TCTCCCTTTTGGTAAAACTTCAGACCC	GATCAGTGCGGGATCCAGTCAGAAAAA	+
CWC21	YDR482C.line.30.chrIV.1420431.1420838_tile_1	Saccharomyces cerevisiae	R64-2-1	chrIV	1420431	1420838	-	TCCAGTCATGTCGTACAACGGAATAGG	CATTGACGATAGCGATAAGCTTCGC	-
CWC21	YDR482C.line.30.chrIV.1420431.1420838_tile_2	Saccharomyces cerevisiae	R64-2-1	chrIV	1420431	1420838	+	TAGATGACCCTTTTGCCGACTTGAG	GAGACTGTTGAGATTTACCGTCATTGC	+
SNP1	YIL061C.line.31.chrIX.244657.245559_tile_1	Saccharomyces cerevisiae	R64-2-1	chrIX	244657	245559	-	TTGGAGTACACAGAGGTATCCAAATCA	AGTAATACTTAAACTCTGCTACTTGTTGT	-
SNP1	YIL061C.line.31.chrIX.244657.245559_tile_2	Saccharomyces cerevisiae	R64-2-1	chrIX	244657	245559	+	TCTATGTCGACTATGCAGATTCTGTCT	AGAGGTTGATAGTAAGTTTGCAACGCC	+
SNP1	YIL061C.line.31.chrIX.244657.245559_tile_3	Saccharomyces cerevisiae	R64-2-1	chrIX	244657	245559	-	CAGTGAGACCTTTTTAAGGTTGTAGGG	TGAAGCACTATATGGAGGAGTTTCCTG	-
IST3	YIR005W.line.32.chrIX.364889.365335_tile_1	Saccharomyces cerevisiae	R64-2-1	chrIX	364889	365335	-	CGATCCAATTCTTCCTTTACAGCTTCA	TCTATGTTCTTGATCTAGAATTGCACG	-
IST3	YIR005W.line.32.chrIX.364889.365335_tile_2	Saccharomyces cerevisiae	R64-2-1	chrIX	364889	365335	+	GGCCAAAAAGGAGTTTACAAAAATACT	AGCACCATTGTAGTTATCAACGTGAGC	+
MSL1	YIR009W.line.33.chrIX.374525.374860_tile_1	Saccharomyces cerevisiae	R64-2-1	chrIX	374525	374860	-	CTATGGCAGCTCTTCTCGGTATATACG	ACTATATCCTACGTGTGAATGATGCGT	-
SNU13	YEL026W.line.34.chrV.101943.102323_tile_1	Saccharomyces cerevisiae	R64-2-1	chrV	101943	102323	-	CTTGACAGCGTAGATTTGGGTCTTGATA	TAGTATGAAATCTGGTTTATTCAAGTTCC	-
SNU13	YEL026W.line.34.chrV.101943.102323_tile_2	Saccharomyces cerevisiae	R64-2-1	chrV	101943	102323	+	CTTCTATTACCACCAACGATGCTTCTG	AATTTCTAGCTAGCTCATCAAAGCCGC	+
U4	snR14.line.35.chrV.167427.167586_tile_1	Saccharomyces cerevisiae	R64-2-1	chrV	167427	167586	-	GAATGCCTAAGTAACCTCTGCATTGTC	TTCATTACCGATATTCATTCTTTCAAAGG	-
PRP22	YER013W.line.36.chrV.178841.182278_tile_1	Saccharomyces cerevisiae	R64-2-1	chrV	178841	182278	-	GAAAATTGTTTCATTATCGAGTCCGCTT	CTTTGTGTTACCTATGTTGAAAATTAGCT	-
PRP22	YER013W.line.36.chrV.178841.182278_tile_2	Saccharomyces cerevisiae	R64-2-1	chrV	178841	182278	+	AGTTCCAGGAACAACTGAACTTGATGC	TTGATCAACATAGTGGAGAAATCCGGA	+
PRP22	YER013W.line.36.chrV.178841.182278_tile_3	Saccharomyces cerevisiae	R64-2-1	chrV	178841	182278	-	GACTTGCTGATCCTTTAAAAATTTGGG	ATTTTTCATGGAGAGCGATATTTTTCC	-
PRP22	YER013W.line.36.chrV.178841.182278_tile_4	Saccharomyces cerevisiae	R64-2-1	chrV	178841	182278	+	TGATGTCGAGCTGAATACAGATGATGG	TGCGTGACAATCAATTTCTGGTCATTG	+
PRP22	YER013W.line.36.chrV.178841.182278_tile_5	Saccharomyces cerevisiae	R64-2-1	chrV	178841	182278	-	GGCCTTTTAATAGCCGCTTTCTTTAACA	AGCCTGTATCAATTCAGACCTCATCGC	-
PRP22	YER013W.line.36.chrV.178841.182278_tile_6	Saccharomyces cerevisiae	R64-2-1	chrV	178841	182278	+	ACTGTGGCAACTGATGTTTTATTTGCG	AAAATTTTTGAACCCACTCCAAAGGGC	+
PRP22	YER013W.line.36.chrV.178841.182278_tile_7	Saccharomyces cerevisiae	R64-2-1	chrV	178841	182278	-	GAGGGGGATCCATGAAGTCAAATTTCAA	GATTGGATTTCACTTGGCAAAGCAGAA	-
PRP22	YER013W.line.36.chrV.178841.182278_tile_8	Saccharomyces cerevisiae	R64-2-1	chrV	178841	182278	+	GCTAAAGGCCATGGGAATTAATGATTT	CGGAGCAGTATTGCAAAACAAACTTTC	+
PRP22	YER013W.line.36.chrV.178841.182278_tile_9	Saccharomyces cerevisiae	R64-2-1	chrV	178841	182278	-	GGAATGATTTTCGCTTTCTTCCTAGAC	GTAATTTGCCTGCTGCCATCTAGTATA	-
PRP22	YER013W.line.36.chrV.178841.182278_tile_10	Saccharomyces cerevisiae	R64-2-1	chrV	178841	182278	+	TTTATAAAGCTGGAGATGCTGAAAGCC	GAGATATTCGCGAAGAACACCAATTCA	+
SMB1	YER029C.line.37.chrV.212587.213177_tile_1	Saccharomyces cerevisiae	R64-2-1	chrV	212587	213177	-	TGGAACCACTTTGAACATCAAGGTAGA	TGATGTAGTGTAGTCTAATATAGTTTCCG	-
SMB1	YER029C.line.37.chrV.212587.213177_tile_2	Saccharomyces cerevisiae	R64-2-1	chrV	212587	213177	+	TAGTATAGTCAGTCCCAACACTCTTTT	ATCGTGAGAAAAACAAGAACATGGAGA	+
LSM4	YER112W.line.38.chrV.387232.387795_tile_1	Saccharomyces cerevisiae	R64-2-1	chrV	387232	387795	-	GTTACCTCTATTGTTGTTTGAATCCCT	ATATTCTATTGTGTTTCTTTTCAGTTCGA	-
LSM4	YER112W.line.38.chrV.387232.387795_tile_2	Saccharomyces cerevisiae	R64-2-1	chrV	387232	387795	+	CCCTGGGCATAAAAGATACTACAACAA	TAGTTTACAGGTTGACTTTCTGGTGGT	+
LSM5	YER146W.line.39.chrV.462585.462866_tile_1	Saccharomyces cerevisiae	R64-2-1	chrV	462585	462866	-	GCTGGTTAAGCAAATCACCAGTGTCAA	GCGCTTCTGTGTATGCTTGTGAG	-
BRR2	YER172C.line.40.chrV.529530.536021_tile_1	Saccharomyces cerevisiae	R64-2-1	chrV	529530	536021	-	TTACTGATTCACAGCTTGCGCAGGTCG	ATCATTGTTTAGTCCTGGATAATCGAA	-
BRR2	YER172C.line.40.chrV.529530.536021_tile_2	Saccharomyces cerevisiae	R64-2-1	chrV	529530	536021	+	ACGTTGGGGTAATTGTTAACAAACGCG	GTGTTCAGGGAATCTCAATGGTAGTCT	+
BRR2	YER172C.line.40.chrV.529530.536021_tile_3	Saccharomyces cerevisiae	R64-2-1	chrV	529530	536021	-	TTCTATCGTCGTATCCATGTGAATCCA	CCTCTTCTGGTTCGGTGAGCTTTAAAG	-
BRR2	YER172C.line.40.chrV.529530.536021_tile_4	Saccharomyces cerevisiae	R64-2-1	chrV	529530	536021	+	GAGACGTATCCCTTACGCCATAATAGC	ACCGATACCGCACCATATTCGTATAAC	+
BRR2	YER172C.line.40.chrV.529530.536021_tile_5	Saccharomyces cerevisiae	R64-2-1	chrV	529530	536021	-	GCTGGTATGACGAAGTCAAACATCTACA	TTACTCATTTCTAAGGATTGTTCTGCA	-
BRR2	YER172C.line.40.chrV.529530.536021_tile_6	Saccharomyces cerevisiae	R64-2-1	chrV	529530	536021	+	GGCTCAATTCTTTCGCTTGGAGAAAAG	AGATGAGAGAACCTTTTATTCCAATCAG	+
BRR2	YER172C.line.40.chrV.529530.536021_tile_7	Saccharomyces cerevisiae	R64-2-1	chrV	529530	536021	-	ACCACCTAATTTCTTCCTTACTTTGAT	GCTGGTGGTAAGATAATAAATAAGCTAGG	-
BRR2	YER172C.line.40.chrV.529530.536021_tile_8	Saccharomyces cerevisiae	R64-2-1	chrV	529530	536021	+	GAATTCACTGTGCCACCAATTTTCTGA	CTGTAGATAATCTCCCCACGGTACTGT	+
BRR2	YER172C.line.40.chrV.529530.536021_tile_9	Saccharomyces cerevisiae	R64-2-1	chrV	529530	536021	-	CGGTGAGATATGAAGAGAAAAGAGAAC	TAGAAACACCTGCCGAAGTTGGTCGTG	-
BRR2	YER172C.line.40.chrV.529530.536021_tile_10	Saccharomyces cerevisiae	R64-2-1	chrV	529530	536021	+	ATGGGTGCTTTCTCTAGAAGTTGTTTT	GCATCATTCCTGCACTTAATGTTACCC	+
BRR2	YER172C.line.40.chrV.529530.536021_tile_11	Saccharomyces cerevisiae	R64-2-1	chrV	529530	536021	-	GACCAGAAGTGACAGATCCTTATCTGA	GTGAATTGGTTGGCGTATACTTACCTA	-
BRR2	YER172C.line.40.chrV.529530.536021_tile_12	Saccharomyces cerevisiae	R64-2-1	chrV	529530	536021	+	TTGCAACAACCCGTCTGCAAATAAATC	GAGGAGTCAAAATAAAACAATCCTTCC	+
BRR2	YER172C.line.40.chrV.529530.536021_tile_13	Saccharomyces cerevisiae	R64-2-1	chrV	529530	536021	-	CCTTAGTACAGGAACAAGTCCGAGAAT	TTTAGACCGTGTCCTCTATCTCAACAG	-
BRR2	YER172C.line.40.chrV.529530.536021_tile_14	Saccharomyces cerevisiae	R64-2-1	chrV	529530	536021	+	ATACCTAGAAAAGCCAACCTCCTTTGA	TTTGAATGATCCTTCCGGTAGGGATAC	+
BRR2	YER172C.line.40.chrV.529530.536021_tile_15	Saccharomyces cerevisiae	R64-2-1	chrV	529530	536021	-	AGCATAATCCAGTAGCGTTGGAGCAG	GGGTGAAACCACAATATGACGAAATAC	-
BRR2	YER172C.line.40.chrV.529530.536021_tile_16	Saccharomyces cerevisiae	R64-2-1	chrV	529530	536021	+	TCTCGAATTTAAGCAGATCAACCAACT	TTGTCAGGATGTGTTTCATAATCGGT	+
BRR2	YER172C.line.40.chrV.529530.536021_tile_17	Saccharomyces cerevisiae	R64-2-1	chrV	529530	536021	-	GGACAGGGCCTGTGCAATAACATTAAT	AGCAATAAACAAGCAGTAGCAATTCTT	-
BRR2	YER172C.line.40.chrV.529530.536021_tile_18	Saccharomyces cerevisiae	R64-2-1	chrV	529530	536021	+	CGGCTACATCATTTTCTTTTAGTCCTT	ATTAGATCGTCAAAGAAGCAAACACGC	+
BUD27	YFL023W.line.41.chrVI.90986.93376_tile_1	Saccharomyces cerevisiae	R64-2-1	chrVI	90986	93376	+	TAGTAAACAGGTATCCTCAGACTGTAA	CGGAAATGGAATTGAAGAAGACGAAGC	+
BUD27	YFL023W.line.41.chrVI.90986.93376_tile_2	Saccharomyces cerevisiae	R64-2-1	chrVI	90986	93376	-	ATTTCATCAGTTTCAATATAGCCGTCC	CCTCCATGTGATTCAAGTTGTCTAAGG	-
BUD27	YFL023W.line.41.chrVI.90986.93376_tile_3	Saccharomyces cerevisiae	R64-2-1	chrVI	90986	93376	+	AACAGATGGACCAACAAGATGAATTGG	ATCCTTTGCGGTGCCCATGTATGAAA	+
BUD27	YFL023W.line.41.chrVI.90986.93376_tile_4	Saccharomyces cerevisiae	R64-2-1	chrVI	90986	93376	-	CTATATCGGTGACAGCAGGCTCTTTT	GCATCTGCCTCTTGTTCTCTTCTTTCA	-
BUD27	YFL023W.line.41.chrVI.90986.93376_tile_5	Saccharomyces cerevisiae	R64-2-1	chrVI	90986	93376	+	AAGAACCTGTTGTGGGGGATGTTATAG	TCAAAAATCCAAGAGGTGTCTAGGTCG	+
BUD27	YFL023W.line.41.chrVI.90986.93376_tile_6	Saccharomyces cerevisiae	R64-2-1	chrVI	90986	93376	-	ATGTAGTGCTACTTCGTCCTCGTCAT	GGAAATTTATCTTGCTCATCAGTGTTATT	-
BUD27	YFL023W.line.41.chrVI.90986.93376_tile_7	Saccharomyces cerevisiae	R64-2-1	chrVI	90986	93376	+	GAGCATGAATTTCCTGAAAGTTACACA	CTAGCAGCAGGATTGGTTTCGATAAAG	+
SMX2	YFL017W-A.line.42.chrVI.103699.103932_tile_1	Saccharomyces cerevisiae	R64-2-1	chrVI	103699	103932	-	GTAACTATCGGCTTTGACTACGGTTGT	GTATCTGTGCGTGTGTTTGCGTAAT	-
SAD1	YFR005C.line.43.chrVI.154527.155873_tile_1	Saccharomyces cerevisiae	R64-2-1	chrVI	154527	155873	-	CTAAGTCAAGAAGCTCCTCTACTAGCAC	AAAAATTGGCACTGGGACTACCAGTAGCC	-
SAD1	YFR005C.line.43.chrVI.154527.155873_tile_2	Saccharomyces cerevisiae	R64-2-1	chrVI	154527	155873	+	CTGCGGTAATCGCGTTAGTTCAAAAAC	TGTTTGAATAGTTTAGGGGACCAAATT	+
SAD1	YFR005C.line.43.chrVI.154527.155873_tile_3	Saccharomyces cerevisiae	R64-2-1	chrVI	154527	155873	-	GAGTCCTGCTTTCATACATTCAATTGA	CATCTTTCAGTTGACGATTTTGTATCC	-
SAD1	YFR005C.line.43.chrVI.154527.155873_tile_4	Saccharomyces cerevisiae	R64-2-1	chrVI	154527	155873	+	CAAATTCAAGAAGACGTGATGGTTTTC	TTTTTGGCATTGCTTACTATACGCGAG	+
BUD13	YGL174W.line.44.chrVII.174545.175345_tile_1	Saccharomyces cerevisiae	R64-2-1	chrVII	174545	175345	-	GGAATCTTCCTGAATCTTGTGACCTTG	AAACGTCCTGTTGTTATCTTCCACC	-
BUD13	YGL174W.line.44.chrVII.174545.175345_tile_2	Saccharomyces cerevisiae	R64-2-1	chrVII	174545	175345	+	AACACGAAAAACCATATACAGAGACGC	AATGGTTTGCTAAGCAAAATGAGATCA	+
BUD13	YGL174W.line.44.chrVII.174545.175345_tile_3	Saccharomyces cerevisiae	R64-2-1	chrVII	174545	175345	-	GGAGAAACAAAGAACAGTAGGAAAGGC	TTCTTCAAAGCCATTTGATCTGTGGAC	-
CWC23	YGL128C.line.45.chrVII.269293.270144_tile_1	Saccharomyces cerevisiae	R64-2-1	chrVII	269293	270144	-	CACAAGACCAAGAAAATGCTTCGCAAC	GCACATATGTATGCCTGTTTTTCTTTA	-
CWC23	YGL128C.line.45.chrVII.269293.270144_tile_2	Saccharomyces cerevisiae	R64-2-1	chrVII	269293	270144	+	CTCAAAGTAGAGCAATCGTAATACGGA	AAATCATCGTAGATGGTATGGACGTCC	+
CWC23	YGL128C.line.45.chrVII.269293.270144_tile_3	Saccharomyces cerevisiae	R64-2-1	chrVII	269293	270144	-	GCTGCCCAAGATCATTCAATTACAAGG	CCCCAAATTAAACGCAAATACAGGACC	-
PRP43	YGL120C.line.46.chrVII.281634.283937_tile_1	Saccharomyces cerevisiae	R64-2-1	chrVII	281634	283937	-	CGTCTGGGTTTTTCATGCAAGTAGCAA	TCAACTAGAAATAGGTACACGTAACCT	-
PRP43	YGL120C.line.46.chrVII.281634.283937_tile_2	Saccharomyces cerevisiae	R64-2-1	chrVII	281634	283937	+	ATGTATCCTTTAGCTCCCGATCTTTTT	ATTAACATCACCGCTAGCATAGGATCC	+
PRP43	YGL120C.line.46.chrVII.281634.283937_tile_3	Saccharomyces cerevisiae	R64-2-1	chrVII	281634	283937	-	TCCAAGAATTAGAGTTGAGTCTTTACTT	GGGTCCTTTGAGTTCCAATGTTCTCAA	-
PRP43	YGL120C.line.46.chrVII.281634.283937_tile_4	Saccharomyces cerevisiae	R64-2-1	chrVII	281634	283937	+	GGGCAGAAGCCTTGGAGATAGGGGAAA	ACGAATGGCAGAATCTAAATAGTCCCT	+
PRP43	YGL120C.line.46.chrVII.281634.283937_tile_5	Saccharomyces cerevisiae	R64-2-1	chrVII	281634	283937	-	GAGTTGCTGAGGAAATGGATGTCAAGT	CTGTTTTGCAAATTCATGCCACTGAAG	-
PRP43	YGL120C.line.46.chrVII.281634.283937_tile_6	Saccharomyces cerevisiae	R64-2-1	chrVII	281634	283937	+	CTGATAGAATAACCAACTTCTTCGCCC	CTCTTCGGATGGAAGAGGATGCTGTTT	+
PRP43	YGL120C.line.46.chrVII.281634.283937_tile_7	Saccharomyces cerevisiae	R64-2-1	chrVII	281634	283937	-	CGTTTGCTGTTTCAACTGACAGTATCA	CACTTGTCCATCATGATGCTGGTGAAT	-
PRP18	YGR006W.line.47.chrVII.506070.506825_tile_1	Saccharomyces cerevisiae	R64-2-1	chrVII	506070	506825	-	AGAGGTTTTCCTTCAGTAGAACCAATT	TCTTAACTTTTTCATCTTCCCTTGCGC	-
PRP18	YGR006W.line.47.chrVII.506070.506825_tile_2	Saccharomyces cerevisiae	R64-2-1	chrVII	506070	506825	+	CCATCTCTGTAATCATTGATCCATCAC	TGAAAGAACGCGATTATGGATTACCAG	+
PRP18	YGR006W.line.47.chrVII.506070.506825_tile_3	Saccharomyces cerevisiae	R64-2-1	chrVII	506070	506825	-	CGGTATGCACACCACAGAATAGTTTAC	CAATCATTATGTTAGCAGCATTCCGGC	-
SNU71	YGR013W.line.48.chrVII.514554.516416_tile_1	Saccharomyces cerevisiae	R64-2-1	chrVII	514554	516416	-	GAAGAGACACCTTGTAAAGATACTGTA	CTGTAAATCGACGTACTCTTAAGGAAC	-
SNU71	YGR013W.line.48.chrVII.514554.516416_tile_2	Saccharomyces cerevisiae	R64-2-1	chrVII	514554	516416	+	TTCCCATTTCCTTAGACCAACAGATTC	GGCTAGCGAATTTTATTCTGTTTTCAA	+
SNU71	YGR013W.line.48.chrVII.514554.516416_tile_3	Saccharomyces cerevisiae	R64-2-1	chrVII	514554	516416	-	ACGATTTGATTCTTCCAGGTCTCTTTC	TTTCTGGCTTAACACTCGGTATAGTTC	-
SNU71	YGR013W.line.48.chrVII.514554.516416_tile_4	Saccharomyces cerevisiae	R64-2-1	chrVII	514554	516416	+	CGACCTTGCCTTAGAGAAGAGAAAAGA	GCTCAGAACACGTCAAGATCAAATTCG	+
SNU71	YGR013W.line.48.chrVII.514554.516416_tile_5	Saccharomyces cerevisiae	R64-2-1	chrVII	514554	516416	-	CCAAGCGAAATTCTTTACGACTCCACA	CTCAGACACATTCTTGTCCGCGTTATA	-
SNU71	YGR013W.line.48.chrVII.514554.516416_tile_6	Saccharomyces cerevisiae	R64-2-1	chrVII	514554	516416	+	GAGGACGGGGAAACGATAGCTGATAGA	AAGCTCTCTCTTAGAAGAACTAAAAGC	+
SMD1/PRP38	YGR074W.line.49.merged_with.YGR075C.line.50.chrVII.635712.636875_tile_1	Saccharomyces cerevisiae	R64-2-1	chrVII	635712	636875	-	CCAAAATCGCGCCTTCTCTTTTTGCT	ATCTTTTTCTCGACGATTTATAAACGATA	-
SMD1/PRP38	YGR074W.line.49.merged_with.YGR075C.line.50.chrVII.635712.636875_tile_2	Saccharomyces cerevisiae	R64-2-1	chrVII	635712	636875	+	AAGATCGGGTCAAATTGCAAATGACCC	ATAATACTGTAACCGCGCATAAACCAG	+
SMD1/PRP38	YGR074W.line.49.merged_with.YGR075C.line.50.chrVII.635712.636875_tile_3	Saccharomyces cerevisiae	R64-2-1	chrVII	635712	636875	-	ACGTGGGTAAAGAACAAGGACTACAAT	ATTTGAATGGCAATAACAAAAACGATG	-
SMD1/PRP38	YGR074W.line.49.merged_with.YGR075C.line.50.chrVII.635712.636875_tile_4	Saccharomyces cerevisiae	R64-2-1	chrVII	635712	636875	+	AGACTCCACTTGAAATTCATTGACAGC	TTTCAATTCATGCTTATGACCCTTGGG	+
PRP31	YGR091W.line.51.chrVII.666341.667825_tile_1	Saccharomyces cerevisiae	R64-2-1	chrVII	666341	667825	-	TGTAATGGTGATGGTATCAATGAAGAT	AGGTCTTTGTATATTTTCTGCAGCCAA	-
PRP31	YGR091W.line.51.chrVII.666341.667825_tile_2	Saccharomyces cerevisiae	R64-2-1	chrVII	666341	667825	+	CACTGTACAGTAGACGTTTTCCAGAAC	ATTGCGTCCATTGGGAAGAATAAGCAC	+
PRP31	YGR091W.line.51.chrVII.666341.667825_tile_3	Saccharomyces cerevisiae	R64-2-1	chrVII	666341	667825	-	TGTCTGACATGCGATAGTCTGAATTTT	TTGCAACTGGGAATGCGACTGAACT	-
PRP31	YGR091W.line.51.chrVII.666341.667825_tile_4	Saccharomyces cerevisiae	R64-2-1	chrVII	666341	667825	+	CTGGGAGAAAATTTAGGAAGTACAAGG	CATGGTTAGGGCTCTTCTACATACTTG	+
PRP31	YGR091W.line.51.chrVII.666341.667825_tile_5	Saccharomyces cerevisiae	R64-2-1	chrVII	666341	667825	-	TATTGCCTGCCAAGAGGTCGACATTT	CCGGAAAACCAATTGGTCTCTTCTTCT	-
DRN1	YGR093W.line.52.chrVII.670388.671911_tile_1	Saccharomyces cerevisiae	R64-2-1	chrVII	670388	671911	-	TGTAAGGAGAATGTCTACCTGATCCTC	TTTTTGAAGTGAAAAAGATATCAGTAAACC	-
DRN1	YGR093W.line.52.chrVII.670388.671911_tile_2	Saccharomyces cerevisiae	R64-2-1	chrVII	670388	671911	+	AAGCATACTGGACGAATTTGGCAAAAG	GGAGACAAACAGGTACTTGCTAATAGAG	+
DRN1	YGR093W.line.52.chrVII.670388.671911_tile_3	Saccharomyces cerevisiae	R64-2-1	chrVII	670388	671911	-	GCAGAACTTTAGAACGAGGTATTTTGG	TCGAACGAATTCTCTGTTTCTGTTTCT	-
DRN1	YGR093W.line.52.chrVII.670388.671911_tile_4	Saccharomyces cerevisiae	R64-2-1	chrVII	670388	671911	+	TCATTTCCACAAACAAGTTATTCCCGT	AGTTTCAAAAGGCCTACAGGACCTATG	+
DRN1	YGR093W.line.52.chrVII.670388.671911_tile_5	Saccharomyces cerevisiae	R64-2-1	chrVII	670388	671911	-	GCCTATAATGACAGTTCAAAAGCCGAA	TTCAGCCTCTATAGTCTCTTGTTGCTT	-
SYF2	YGR129W.line.53.chrVII.750400.751047_tile_1	Saccharomyces cerevisiae	R64-2-1	chrVII	750400	751047	-	GTTTTTATTGTCTTCTTCATCGGCGGA	CTTCGAATACTTTGACAAGATATGGTTTT	-
SYF2	YGR129W.line.53.chrVII.750400.751047_tile_2	Saccharomyces cerevisiae	R64-2-1	chrVII	750400	751047	+	AACACAGAATTCGAGCAAACAGGATAG	TTCAGAAGAGAGTCCATCTTACTCGGT	+
U5	snR7-L.line.54.chrVII.939459.939672_tile_1	Saccharomyces cerevisiae	R64-2-1	chrVII	939459	939672	-	CGTGGTGTTAGTATTCTCATCACGATT	TTTTTCTACAAATTTGATTCATGAGTCCA	-
CWC22	YGR278W.line.55.chrVII.1046731.1048464_tile_1	Saccharomyces cerevisiae	R64-2-1	chrVII	1046731	1048464	-	AAGATCACGATTTCATGAATTACATCATA	GGTTTGTAGCCTTTTTATTCCTTTTTAGG	-
CWC22	YGR278W.line.55.chrVII.1046731.1048464_tile_2	Saccharomyces cerevisiae	R64-2-1	chrVII	1046731	1048464	+	CCTTCAATGTCTGTCCATTTTATTTCT	ACGCTACGACAGAAGCTGCTGATAAA	+
CWC22	YGR278W.line.55.chrVII.1046731.1048464_tile_3	Saccharomyces cerevisiae	R64-2-1	chrVII	1046731	1048464	-	ATTAAGTGTCCCCAAAACTTACCTAAG	TCAAACGCCATGGTTAGTTCATTGAAA	-
CWC22	YGR278W.line.55.chrVII.1046731.1048464_tile_4	Saccharomyces cerevisiae	R64-2-1	chrVII	1046731	1048464	+	AAGATTATGAAACTGACCAACTGCGAA	ACAACCAACCCAAGGGCCAAAAATTC	+
CWC22	YGR278W.line.55.chrVII.1046731.1048464_tile_5	Saccharomyces cerevisiae	R64-2-1	chrVII	1046731	1048464	-	GCTTTCTGGTTTGCCTTCGCTAATCTT	ACTCTCTGGCCTTCTTCCGTAACTT	-
NAM8	YHR086W.line.56.chrVIII.278153.279724_tile_1	Saccharomyces cerevisiae	R64-2-1	chrVIII	278153	279724	-	TTGGAAAATTGGGTATAAGCATACCAT	TGTACCCGCAATGTATTAGGAACTTTT	-
NAM8	YHR086W.line.56.chrVIII.278153.279724_tile_2	Saccharomyces cerevisiae	R64-2-1	chrVIII	278153	279724	+	ACTCATGCAGCAAATGCACTTTTAAAG	AGCAGCATGTCAGCGGTAACAACGATTA	+
NAM8	YHR086W.line.56.chrVIII.278153.279724_tile_3	Saccharomyces cerevisiae	R64-2-1	chrVIII	278153	279724	-	CCCCAAGACAGTCTAACTCTTGAATTTG	CTGACCAGATGTGGGTCCTACTTTTAT	-
NAM8	YHR086W.line.56.chrVIII.278153.279724_tile_4	Saccharomyces cerevisiae	R64-2-1	chrVIII	278153	279724	+	ATTGCTGGGATGCAAGGGTTCCCCATT	GGTTGTTAACAGCACTAATGCAATGTT	+
NAM8	YHR086W.line.56.chrVIII.278153.279724_tile_5	Saccharomyces cerevisiae	R64-2-1	chrVIII	278153	279724	-	GGCCGTAATGAGTAGTGATGGAAAGAA	CTTCGCTTCCTTGCATGATAACTTGTT	-
LSM12	YHR121W.line.57.chrVIII.352756.353319_tile_1	Saccharomyces cerevisiae	R64-2-1	chrVIII	352756	353319	-	TCTCCTATGGTCTTGAAGATTTGATCG	CGAAAGATGCAAATTGATTTCTTTAGTTA	-
LSM12	YHR121W.line.57.chrVIII.352756.353319_tile_2	Saccharomyces cerevisiae	R64-2-1	chrVIII	352756	353319	+	GTGTGAGTGCAGAGGGTCAGTTCATTT	CTTGGGTGTACGGTGTTTGAATAATTG	+
LIN1	YHR156C.line.58.chrVIII.411384.412406_tile_1	Saccharomyces cerevisiae	R64-2-1	chrVIII	411384	412406	-	AGTACTGGAATCCTTGGGCAGGTTAA	AAAAGTTGAAATTATTCAAGAGAATTGCC	-
LIN1	YHR156C.line.58.chrVIII.411384.412406_tile_2	Saccharomyces cerevisiae	R64-2-1	chrVIII	411384	412406	+	TTTGAAATGGCAATTTTTCGCAGCTTG	TTTCGATTTCTTTCGCTTTCTATGGTC	+
LIN1	YHR156C.line.58.chrVIII.411384.412406_tile_3	Saccharomyces cerevisiae	R64-2-1	chrVIII	411384	412406	-	CTGACTAGATTAAAAGAAGCGCATCCG	TTCAGCTTTTGGATATTGCAGAGTTCA	-
PRP8	YHR165C.line.59.chrVIII.429707.436948_tile_1	Saccharomyces cerevisiae	R64-2-1	chrVIII	429707	436948	-	GAAAAGAGACTGCATTGATATTTCAATTT	ATATTCCCCAATAAACTGGAATCTGTTA	-
PRP8	YHR165C.line.59.chrVIII.429707.436948_tile_2	Saccharomyces cerevisiae	R64-2-1	chrVIII	429707	436948	+	CTTAATGATACTGATCCCGGGGTGGAA	ACGAAATCATCAGCCGAAACATAAATG	+
PRP8	YHR165C.line.59.chrVIII.429707.436948_tile_3	Saccharomyces cerevisiae	R64-2-1	chrVIII	429707	436948	-	GGATCACTATCGAATCTCAAATGAGAGA	GAGGAACAGAATGTTTACGTCCTTCCA	-
PRP8	YHR165C.line.59.chrVIII.429707.436948_tile_4	Saccharomyces cerevisiae	R64-2-1	chrVIII	429707	436948	+	TTTTCTGCCGTACTCAGTCAAAATCAA	TTGCCTTTCTTGTGACGATAATTTGTT	+
PRP8	YHR165C.line.59.chrVIII.429707.436948_tile_5	Saccharomyces cerevisiae	R64-2-1	chrVIII	429707	436948	-	CCTTCGTGAACGTATTAGAAAAGGTCT	GCTTGATCCTTTAGAGGTTCACATGCT	-
PRP8	YHR165C.line.59.chrVIII.429707.436948_tile_6	Saccharomyces cerevisiae	R64-2-1	chrVIII	429707	436948	+	GGTTCCTGTACACTAGATTGATATATTTG	TGAACACTTTCCATAGTTATGTCAGCGG	+
PRP8	YHR165C.line.59.chrVIII.429707.436948_tile_7	Saccharomyces cerevisiae	R64-2-1	chrVIII	429707	436948	-	CCGGGTTTGAGGATTCCATGCAATTTA	GAATGGGAAGTTTCAAAACCCTCCCTA	-
PRP8	YHR165C.line.59.chrVIII.429707.436948_tile_8	Saccharomyces cerevisiae	R64-2-1	chrVIII	429707	436948	+	CCAGTTCTTTGAGCATGAGTTAGCTTC	GAATAGCTTCCTGCCTTTTCGTTGCA	+
PRP8	YHR165C.line.59.chrVIII.429707.436948_tile_9	Saccharomyces cerevisiae	R64-2-1	chrVIII	429707	436948	-	GCCGCTAAATGGAACACTTCACTGATA	GCAGAATAGGAGGTTAGCTTTTGAAGA	-
PRP8	YHR165C.line.59.chrVIII.429707.436948_tile_10	Saccharomyces cerevisiae	R64-2-1	chrVIII	429707	436948	+	TGGCTTCTCTAAAGTATGTGAAAAGGG	CCTAGGTTAACGTCCTGACGTATTAGC	+
PRP8	YHR165C.line.59.chrVIII.429707.436948_tile_11	Saccharomyces cerevisiae	R64-2-1	chrVIII	429707	436948	-	GAGTCACGTCAACAAATATGGCTTAATA	CGAGCAGTGTTTTGGGAAATTCAAAGT	-
PRP8	YHR165C.line.59.chrVIII.429707.436948_tile_12	Saccharomyces cerevisiae	R64-2-1	chrVIII	429707	436948	+	ATATGAAAGAAGCGAACTTCAACCCGC	TTCCAAGGGATCAACTGAATAAACAGGG	+
PRP8	YHR165C.line.59.chrVIII.429707.436948_tile_13	Saccharomyces cerevisiae	R64-2-1	chrVIII	429707	436948	-	CAAAGGCAAATACAGAAAAACGGTCCC	AGATTACCGATGCATATCTTGATCAGT	-
PRP8	YHR165C.line.59.chrVIII.429707.436948_tile_14	Saccharomyces cerevisiae	R64-2-1	chrVIII	429707	436948	+	TGGTCGTAGCCTCTTCGGGAGTAATTT	GGCGTCAAGTCTTTGTTTAGTTGTAGT	+
PRP8	YHR165C.line.59.chrVIII.429707.436948_tile_15	Saccharomyces cerevisiae	R64-2-1	chrVIII	429707	436948	-	TGATGCGTGAATTGCTAAAAATGATGA	ACTACGATCTTGAGTTACGAAACTCGG	-
PRP8	YHR165C.line.59.chrVIII.429707.436948_tile_16	Saccharomyces cerevisiae	R64-2-1	chrVIII	429707	436948	+	AACTGCACATGTGTATCTACAATCAGT	CGTCAGGATGTTGCAAAAACCATTTTT	+
PRP8	YHR165C.line.59.chrVIII.429707.436948_tile_17	Saccharomyces cerevisiae	R64-2-1	chrVIII	429707	436948	-	CGTTTCCTCATCTATATAATTCCCGGCC	GGAGTATCCCGTTAAAGTTAAGGTCTC	-
PRP8	YHR165C.line.59.chrVIII.429707.436948_tile_18	Saccharomyces cerevisiae	R64-2-1	chrVIII	429707	436948	+	ATTATACCATGGTATGCGCACTGAACG	TTCATCATCTTGAGAGTCTAAGGGAAG	+
PRP8	YHR165C.line.59.chrVIII.429707.436948_tile_19	Saccharomyces cerevisiae	R64-2-1	chrVIII	429707	436948	-	GGCCTCCAAAATGTACAATACTGATAAA	ATGTTAAAGATTGGCTCTACGATTCCC	-
PRP8	YHR165C.line.59.chrVIII.429707.436948_tile_20	Saccharomyces cerevisiae	R64-2-1	chrVIII	429707	436948	+	AATACTTTAGAGCGCCTAGAAAAGCCT	TCGGATTATCCAGTTCTTCGATTTCGT	+
PRP8	YHR165C.line.59.chrVIII.429707.436948_tile_21	Saccharomyces cerevisiae	R64-2-1	chrVIII	429707	436948	-	GTCTCAAGAGATTGAAGAGGCTCGTAT	GGTGCCATCATCGGTAAATGAGGATAC	-
PRP21	YJL203W.line.60.chrX.53341.54183_tile_1	Saccharomyces cerevisiae	R64-2-1	chrX	53341	54183	-	CTTATGTAGCGGATGTGAGCTGTTCAT	TACAACTGCAAATTATTGCTGTTAGTT	-
PRP21	YJL203W.line.60.chrX.53341.54183_tile_2	Saccharomyces cerevisiae	R64-2-1	chrX	53341	54183	+	AAAGGATGGTGAAGCCAGATTAAACTT	AAGGAGGAGATAGTAAGGGCAAAAAGC	+
PRP21	YJL203W.line.60.chrX.53341.54183_tile_3	Saccharomyces cerevisiae	R64-2-1	chrX	53341	54183	-	CTTATCGCCAATTTCATCAGATGCTGG	TTGCTTACCTTGGTCGGATACTATCTT	-
LSM1	YJL124C.line.61.chrX.187126.187644_tile_1	Saccharomyces cerevisiae	R64-2-1	chrX	187126	187644	-	AAGCTCAGTAGACCGTAAAATCTTCGT	GAAAAACACAATACTACCAACATATATCCT	-
LSM1	YJL124C.line.61.chrX.187126.187644_tile_2	Saccharomyces cerevisiae	R64-2-1	chrX	187126	187644	+	GAATAGCATTCTTCCATCACGCAAAAG	CACCGTTGTATATTCACGACTTCCTCT	+
LSM8	YJR022W.line.62.chrX.469784.470113_tile_1	Saccharomyces cerevisiae	R64-2-1	chrX	469784	470113	-	TCGATTTTATTCTTGGTGTCCTTTAGC	CGCCATGATAGTATTTTCAGGACTTAA	-
LSM8	YJR022W.line.62.chrX.469784.470113_tile_2	Saccharomyces cerevisiae	R64-2-1	chrX	469784	470113	+	CTCCTATAGACGAAAAGAAGGTCCCAA	AAAGTCTTGTGCAAGTCATCGATCAAC	+
ISY1	YJR050W.line.63.chrX.528697.529404_tile_1	Saccharomyces cerevisiae	R64-2-1	chrX	528697	529404	-	TCTCTTACCATTTATCAGCTTTCCTGA	TTGAATGCACAGGTATCTGATTACTGA	-
ISY1	YJR050W.line.63.chrX.528697.529404_tile_2	Saccharomyces cerevisiae	R64-2-1	chrX	528697	529404	+	GTTAGAAGACAGTCATGTGCTGATGAA	GGCACTATTTCGAATGACCATCACAAG	+
SNU114	YKL173W.line.64.chrXI.122517.125543_tile_1	Saccharomyces cerevisiae	R64-2-1	chrXI	122517	125543	-	CCAACATTTATTATCCTCTCCGGAATGT	TTGCTATGTTAGGAGCTATTGTGTATC	-
SNU114	YKL173W.line.64.chrXI.122517.125543_tile_2	Saccharomyces cerevisiae	R64-2-1	chrXI	122517	125543	+	AATCGAGACTATATGTTATCAATGGCT	CATTTGTGGTAGAGCAATTGATAAAACA	+
SNU114	YKL173W.line.64.chrXI.122517.125543_tile_3	Saccharomyces cerevisiae	R64-2-1	chrXI	122517	125543	-	CAACGAAAGTCGGGTACTTCTCTACAT	AACACCTTCTACAACATCTATCACGAT	-
SNU114	YKL173W.line.64.chrXI.122517.125543_tile_4	Saccharomyces cerevisiae	R64-2-1	chrXI	122517	125543	+	GGTAATTTCAGGACAAAACCATTTGAA	GAAGAGAGGGGATACAGTACGTATACT	+
SNU114	YKL173W.line.64.chrXI.122517.125543_tile_5	Saccharomyces cerevisiae	R64-2-1	chrXI	122517	125543	-	TCAGGGCATCCAATAACTTGGGTAATT	AAAGTCCAGAGTATATCCGTACAAGGG	-
SNU114	YKL173W.line.64.chrXI.122517.125543_tile_6	Saccharomyces cerevisiae	R64-2-1	chrXI	122517	125543	+	ATTGTTCTTCAACCTTTACTGCCAAGG	GCTTGGATATTGACGGAATAATGGACA	+
SNU114	YKL173W.line.64.chrXI.122517.125543_tile_7	Saccharomyces cerevisiae	R64-2-1	chrXI	122517	125543	-	GATGGGTTCCAATAAAATTGGGATTGC	GTTTTGACCCTTTCCCAATGTGTTCCT	-
SNU114	YKL173W.line.64.chrXI.122517.125543_tile_8	Saccharomyces cerevisiae	R64-2-1	chrXI	122517	125543	+	AAAAGCCTGTTACGTTGGCTTACTGAC	AACAAGAAGGCGGAAGGGTATTTCTAC	+
SNU114	YKL173W.line.64.chrXI.122517.125543_tile_9	Saccharomyces cerevisiae	R64-2-1	chrXI	122517	125543	-	GCGAAAGCAACTCCTTCAACTTGAAAC	TCATCACGAAATCACGACTTAAACTGT	-
DBR1	YKL149C.line.65.chrXI.167612.168829_tile_1	Saccharomyces cerevisiae	R64-2-1	chrXI	167612	168829	-	GGTCTGGTATTATGAATTGCCAAGAAG	ATTTCTATTACGAATGCAGACGGAATT	-
DBR1	YKL149C.line.65.chrXI.167612.168829_tile_2	Saccharomyces cerevisiae	R64-2-1	chrXI	167612	168829	+	TCGCCGTATTTGGAATCATACTCATTC	TGATACAGATTTCTTATGTTAGCTTTCCA	+
DBR1	YKL149C.line.65.chrXI.167612.168829_tile_3	Saccharomyces cerevisiae	R64-2-1	chrXI	167612	168829	-	GCGAAGACTCCCATCGATCTATTAATT	GTAAGAATTTCTGATATTGCTCCTCTTTT	-
DBR1	YKL149C.line.65.chrXI.167612.168829_tile_4	Saccharomyces cerevisiae	R64-2-1	chrXI	167612	168829	+	CACGAATACTTTGAAAATCTCCAAGAA	AGGTATATATACAAATTAGTGAGTCAGTGG	+
YJU2	YKL095W.line.66.chrXI.262277.263113_tile_1	Saccharomyces cerevisiae	R64-2-1	chrXI	262277	263113	-	CAGCTGTTTTAGCGTTCAGGTCATCAT	CTTGTATTCTCCTATCAGCCTGGAAAC	-
YJU2	YKL095W.line.66.chrXI.262277.263113_tile_2	Saccharomyces cerevisiae	R64-2-1	chrXI	262277	263113	+	GTAAGAAACTATGTCCCTCAGAAACCA	GAAGAGAACTCCGTTGTTTAATCCTAC	+
YJU2	YKL095W.line.66.chrXI.262277.263113_tile_3	Saccharomyces cerevisiae	R64-2-1	chrXI	262277	263113	-	TCGTATTGAAGTTCAGGTACTGTCGTC	CATCGTTGTTATTGCCAGGTTTATTGG	-
MUD2	YKL074C.line.67.chrXI.294610.296193_tile_1	Saccharomyces cerevisiae	R64-2-1	chrXI	294610	296193	-	GGATTACGTTTCAAAGCCTGCCAAATC	TGGTCTATTTTGTAGAGCGAAATTAAGTA	-
MUD2	YKL074C.line.67.chrXI.294610.296193_tile_2	Saccharomyces cerevisiae	R64-2-1	chrXI	294610	296193	+	GATTCAACACGAACAGATTGGGTAACC	TTAAAGAATGATCGACAGGCCAAAACC	+
MUD2	YKL074C.line.67.chrXI.294610.296193_tile_3	Saccharomyces cerevisiae	R64-2-1	chrXI	294610	296193	-	CGATCGTTTCAATTACCAAAGGAAGAA	GCGAAGCTTGGTACTTTCGACTTAAAA	-
MUD2	YKL074C.line.67.chrXI.294610.296193_tile_4	Saccharomyces cerevisiae	R64-2-1	chrXI	294610	296193	+	ACGGTCGCCATTGAATTTAGAACCTTC	TCTCAATCGGCACAACATCCTTTTCTG	+
MUD2	YKL074C.line.67.chrXI.294610.296193_tile_5	Saccharomyces cerevisiae	R64-2-1	chrXI	294610	296193	-	CCTAAAACGGCTGCTAAAGACCCTATA	CAAAAGATTCAACACGGATAATGCAGT	-
PRP40	YKL012W.line.68.chrXI.418310.420061_tile_1	Saccharomyces cerevisiae	R64-2-1	chrXI	418310	420061	-	AGTCCTTCTCCTGACATTAAGCAGTTT	TTTCACGTCTCCCACCTCCGGCAATGCT	-
PRP40	YKL012W.line.68.chrXI.418310.420061_tile_2	Saccharomyces cerevisiae	R64-2-1	chrXI	418310	420061	+	GGAGGAAAGCCAATATGCTAATAACTC	CCGTGGTCAATGAAAAGACAAAGAGAC	+
PRP40	YKL012W.line.68.chrXI.418310.420061_tile_3	Saccharomyces cerevisiae	R64-2-1	chrXI	418310	420061	-	GATTGGCACTTCTCTTAATAAGCTTTT	GTGTTTGTATATTGGTTCGTCGGCAAT	-
PRP40	YKL012W.line.68.chrXI.418310.420061_tile_4	Saccharomyces cerevisiae	R64-2-1	chrXI	418310	420061	+	CAGAGACCGTATTGCTAGAGATAACTT	ATGAGCGTAGGATATTGGAGCAAAAGA	+
PRP40	YKL012W.line.68.chrXI.418310.420061_tile_5	Saccharomyces cerevisiae	R64-2-1	chrXI	418310	420061	-	CTAAGAAATTGTGCGGTGATCGCAAAC	TTGGAGTTTCTGTTGTATCTTTTCGTT	-
NTR2	YKR022C.line.69.chrXI.482171.483139_tile_1	Saccharomyces cerevisiae	R64-2-1	chrXI	482171	483139	-	TGAAAAGGAGATTACGAACTTCAGTGA	TTTTTAATCGCTGTACTATTAAAAAGGGA	-
NTR2	YKR022C.line.69.chrXI.482171.483139_tile_2	Saccharomyces cerevisiae	R64-2-1	chrXI	482171	483139	+	TTCGTCTTGAAAGCCTTGCATTTCATC	TCAAAGGTAATGTCGCGCTTAGGAAC	+
NTR2	YKR022C.line.69.chrXI.482171.483139_tile_3	Saccharomyces cerevisiae	R64-2-1	chrXI	482171	483139	-	GTTCACTTTGCCATTATTTGCTGCTGC	GGCGAACAAGCAATAAAGGAGGATAAT	-
PRP16	YKR086W.line.70.chrXI.599857.603072_tile_1	Saccharomyces cerevisiae	R64-2-1	chrXI	599857	603072	-	GCCTCAACTGTTTGGCCTTTAGTTTA	CCAGAGGTATTTGTATTGTCTTTGGGC	-
PRP16	YKR086W.line.70.chrXI.599857.603072_tile_2	Saccharomyces cerevisiae	R64-2-1	chrXI	599857	603072	+	CTACACGGACGTTGTTCAAGAGAATAG	CTTCCATAATTATCGGGTCCATCTCTG	+
PRP16	YKR086W.line.70.chrXI.599857.603072_tile_3	Saccharomyces cerevisiae	R64-2-1	chrXI	599857	603072	-	GTTTTACCTGAGCCCGTTTCACCAATT	GGGCACTTTGTTTTCAAGAGCAAACTT	-
PRP16	YKR086W.line.70.chrXI.599857.603072_tile_4	Saccharomyces cerevisiae	R64-2-1	chrXI	599857	603072	+	TGATAAGAGAAAATCAAGTAGTGGTGA	ATCACTTCAGCAACAATGAATGCGAAG	+
PRP16	YKR086W.line.70.chrXI.599857.603072_tile_5	Saccharomyces cerevisiae	R64-2-1	chrXI	599857	603072	-	CCTTTTAGTGCCATGTAGATCCTGAAAA	ATGAGTTTTAGATCTCTTCTACGTGCT	-
PRP16	YKR086W.line.70.chrXI.599857.603072_tile_6	Saccharomyces cerevisiae	R64-2-1	chrXI	599857	603072	+	CTTTACCTGCAGATTTGCAATTCAAAA	CCCGTTCATTGATAAACCACCCTTAC	+
PRP16	YKR086W.line.70.chrXI.599857.603072_tile_7	Saccharomyces cerevisiae	R64-2-1	chrXI	599857	603072	-	CTTGCCCTGACAAGTGATTTGTATTGA	ACTTACTCAATTCGTCAGTAACGTCCA	-
PRP16	YKR086W.line.70.chrXI.599857.603072_tile_8	Saccharomyces cerevisiae	R64-2-1	chrXI	599857	603072	+	GTTCGCATTGGTGTAACAAACATTTTG	CTACAGGCCTCTTTGGTGAACACTATG	+
PRP16	YKR086W.line.70.chrXI.599857.603072_tile_9	Saccharomyces cerevisiae	R64-2-1	chrXI	599857	603072	-	GAACAATCTGATTGTAGCAGTATGGGT	TGTGGCCTCCTGATCATTTTTAATACG	-
PRP19	YLL036C.line.71.chrXII.66745.68256_tile_1	Saccharomyces cerevisiae	R64-2-1	chrXII	66745	68256	-	CCCCGTAGATGAAGAAGCCAAGATAA	ACGCTGACACGTTTGTACTTTCTAAA	-
PRP19	YLL036C.line.71.chrXII.66745.68256_tile_2	Saccharomyces cerevisiae	R64-2-1	chrXII	66745	68256	+	TACCCATTGTCTGCAAATTTAACCTCT	CTGGAAATAATAGCTGGATGCTCTCCC	+
PRP19	YLL036C.line.71.chrXII.66745.68256_tile_3	Saccharomyces cerevisiae	R64-2-1	chrXII	66745	68256	-	GTCGCTGCGCAACTATTGATGGAAAAA	GGGCCTTGTAATCGTTTGCTACTACTA	-
PRP19	YLL036C.line.71.chrXII.66745.68256_tile_4	Saccharomyces cerevisiae	R64-2-1	chrXII	66745	68256	+	ATTTGGGTAAATCCTTCGAATCTTCGT	TTCTAGGAACTTTCCCACTAATAGCAC	+
PRP19	YLL036C.line.71.chrXII.66745.68256_tile_5	Saccharomyces cerevisiae	R64-2-1	chrXII	66745	68256	-	CCTGTTTGGAATCTATCACCATAGCGG	GCCAGTTCTATCACCTAAATCCAGGAC	-
PML1	YLR016C.line.72.chrXII.176802.177416_tile_1	Saccharomyces cerevisiae	R64-2-1	chrXII	176802	177416	-	ATACAGAAAGAATGACAAGGATAAAGGA	TATATAAGAAACACACTTTCAGTGTGTTT	-
PML1	YLR016C.line.72.chrXII.176802.177416_tile_2	Saccharomyces cerevisiae	R64-2-1	chrXII	176802	177416	+	TGCCGTTCAAATCGTATCTTTTCCACG	GGACGCCTTTATTGTCAATTATGTGAA	+
U6	snR6.line.73.chrXII.366235.366346_tile_1	Saccharomyces cerevisiae	R64-2-1	chrXII	366235	366346	-	GGATCGTTCAGAGTATGATCGTACCAT	CATTTATTTATAGTAGCCGAAAATAGTGGA	-
MSL5	YLR116W.line.74.chrXII.380822.382252_tile_1	Saccharomyces cerevisiae	R64-2-1	chrXII	380822	382252	-	CTCAACAAGTTTAATACGTTCATCCTC	ACAATTTCCTTTTATTGTGGGATAGAATAG	-
MSL5	YLR116W.line.74.chrXII.380822.382252_tile_2	Saccharomyces cerevisiae	R64-2-1	chrXII	380822	382252	+	CCGTGAGCAGAGGTATAGAAAGAAACT	AAGGCCAGAATGACTTGAAACGAGGA	+
MSL5	YLR116W.line.74.chrXII.380822.382252_tile_3	Saccharomyces cerevisiae	R64-2-1	chrXII	380822	382252	-	CGTGAAGAAGCCGGAAATTTTAAAGGA	CGGAGATGTCACCGCTTTGATAACAAT	-
MSL5	YLR116W.line.74.chrXII.380822.382252_tile_4	Saccharomyces cerevisiae	R64-2-1	chrXII	380822	382252	+	CTCGTTATGACAATAACTCGACGGAAC	GTTGAAGGTATGTAGTCTCTATTTTGC	+
CLF1	YLR117C.line.75.chrXII.382471.384534_tile_1	Saccharomyces cerevisiae	R64-2-1	chrXII	382471	384534	-	CCCGACGGAGCAACAACTATTAGATTT	AAAGGTAAGGGTATCGTGAAATAATATTTT	-
CLF1	YLR117C.line.75.chrXII.382471.384534_tile_2	Saccharomyces cerevisiae	R64-2-1	chrXII	382471	384534	+	ATCCACATTTTCGCTTTGCAGTTTTGC	AAGTTTTAGCCTTAGGACATAAACCGA	+
CLF1	YLR117C.line.75.chrXII.382471.384534_tile_3	Saccharomyces cerevisiae	R64-2-1	chrXII	382471	384534	-	GAGTAATAACGCCTATGATTATGACACC	CAAAGGATATATCGAGTTGGAAGTGAA	-
CLF1	YLR117C.line.75.chrXII.382471.384534_tile_4	Saccharomyces cerevisiae	R64-2-1	chrXII	382471	384534	+	CTGAAATGAGATCCAAGTACAGCCACC	GTATTTTGAGTAAATCTCTCTTACACCG	+
CLF1	YLR117C.line.75.chrXII.382471.384534_tile_5	Saccharomyces cerevisiae	R64-2-1	chrXII	382471	384534	-	TGAGGGTTATTTGAAGAGAAACCGACT	TCATGGCTCACCCGCAAATGCAGACAT	-
CLF1	YLR117C.line.75.chrXII.382471.384534_tile_6	Saccharomyces cerevisiae	R64-2-1	chrXII	382471	384534	+	CGCATAACGAATCCATTGTCCCATATC	GCTCTTCTTGATAAATGAAGCCAAGTC	+
USB1	YLR132C.line.76.chrXII.407283.408155_tile_1	Saccharomyces cerevisiae	R64-2-1	chrXII	407283	408155	-	CCCCTTTTAAACTTCAAATCTGCTCATA	AGTGTTATAGGAATAGCCGCCCAAA	-
USB1	YLR132C.line.76.chrXII.407283.408155_tile_2	Saccharomyces cerevisiae	R64-2-1	chrXII	407283	408155	+	GGCTCGTTCTGATATATATAACTTCGG	AAATCAGTGGAATCGGCTTTCTGTATG	+
USB1	YLR132C.line.76.chrXII.407283.408155_tile_3	Saccharomyces cerevisiae	R64-2-1	chrXII	407283	408155	-	CGTGCGTATCTATGTGTGTGTATTCTA	CCTGCAATACCGGATTCAATTATATTG	-
SMD3	YLR147C.line.77.chrXII.434158.434463_tile_1	Saccharomyces cerevisiae	R64-2-1	chrXII	434158	434463	-	CAGCTTCTTATTTCTTTCGTTCTATAGATT	TAGGAAACGTGACGGCAGAAACGCATT	-
SMD2	YLR275W.line.78.chrXII.694378.694800_tile_1	Saccharomyces cerevisiae	R64-2-1	chrXII	694378	694800	-	ACACAACGATAACTGAATCACCTCTTA	AACGGTTTTATAATACTCCTCTAATCAAC	-
SMD2	YLR275W.line.78.chrXII.694378.694800_tile_2	Saccharomyces cerevisiae	R64-2-1	chrXII	694378	694800	+	ATCGGGAAAGATTCATAAGTAAACTATTC	TGTGGAAAGGAACAAACTTGACTTTGG	+
YHC1	YLR298C.line.79.chrXII.724721.725416_tile_1	Saccharomyces cerevisiae	R64-2-1	chrXII	724721	725416	-	GGTTAAAGCCAGCAAATTACCCCAAAG	TCAACAACGAATGAAAATGGTATGATG	-
YHC1	YLR298C.line.79.chrXII.724721.725416_tile_2	Saccharomyces cerevisiae	R64-2-1	chrXII	724721	725416	+	GGAATGGTGTGCAGATTTTTCATTGGC	ATTCACAATAGTATCTCGTCATTGCCT	+
YHC1	YLR298C.line.79.chrXII.724721.725416_tile_3	Saccharomyces cerevisiae	R64-2-1	chrXII	724721	725416	-	GAAGGGGCGGATCTTTTCTTTTGATCA	CTGTCATTCGTATTTGACCCATGACAC	-
CWC24	YLR323C.line.80.chrXII.778173.778952_tile_1	Saccharomyces cerevisiae	R64-2-1	chrXII	778173	778952	-	GCCTCACTAAACAGATTAACCAACCAAC	GGAGAATGCCATATCACCCCAAAAATT	-
CWC24	YLR323C.line.80.chrXII.778173.778952_tile_2	Saccharomyces cerevisiae	R64-2-1	chrXII	778173	778952	+	ATCCATCAGCACCGTGGTCCGGATATT	ACCTGGAGCTTTGATTAAGTGATGGAG	+
SPP382	YLR424W.line.81.chrXII.973395.975521_tile_1	Saccharomyces cerevisiae	R64-2-1	chrXII	973395	975521	-	TCCTCAGAGCTCAAGTAATCCTCATTT	TTGGCGTACTGAAGGCTTAAGTTCT	-
SPP382	YLR424W.line.81.chrXII.973395.975521_tile_2	Saccharomyces cerevisiae	R64-2-1	chrXII	973395	975521	+	ATACCAACTCCAGTAACTATCACAGTG	TCTGAATTGGAGGTTACTTTGAGGGAC	+
SPP382	YLR424W.line.81.chrXII.973395.975521_tile_3	Saccharomyces cerevisiae	R64-2-1	chrXII	973395	975521	-	AGACGAATTCCTCCATGATATGCTCTT	AGAAGCCTCTCTTGTCCATAATATTCT	-
SPP382	YLR424W.line.81.chrXII.973395.975521_tile_4	Saccharomyces cerevisiae	R64-2-1	chrXII	973395	975521	+	CAACAAGTGCTAAGTTTTATCGGGTGT	GAGGATTGGAAGGAAAAACAGGAATGG	+
SPP382	YLR424W.line.81.chrXII.973395.975521_tile_5	Saccharomyces cerevisiae	R64-2-1	chrXII	973395	975521	-	CGATCACTTGTGTTTCCATTAAGTTTCG	AACTCGTAGATGGGGTCATTATGTCTT	-
SPP382	YLR424W.line.81.chrXII.973395.975521_tile_6	Saccharomyces cerevisiae	R64-2-1	chrXII	973395	975521	+	TGAAGATTTCGATTTGAGACAGGGTTT	GAGGTGAGATAGGCACGATTTATATAT	+
SEN1	YLR430W.line.82.chrXII.993434.1000129_tile_1	Saccharomyces cerevisiae	R64-2-1	chrXII	993434	1000129	-	AGAATGCATTTATCACAAACAGAGAGA	AGAGATAGATGCCATACAGAGATGAAG	-
SEN1	YLR430W.line.82.chrXII.993434.1000129_tile_2	Saccharomyces cerevisiae	R64-2-1	chrXII	993434	1000129	+	CATGGCTGAAGAATCATTTTAATCCAA	TTCAAAAGAGGAAAATGAGTGGTCACG	+
SEN1	YLR430W.line.82.chrXII.993434.1000129_tile_3	Saccharomyces cerevisiae	R64-2-1	chrXII	993434	1000129	-	GAATGTGAAGGGTTCAATTTTGGACCA	CTTCACACCAGCAAAATATGACACCTG	-
SEN1	YLR430W.line.82.chrXII.993434.1000129_tile_4	Saccharomyces cerevisiae	R64-2-1	chrXII	993434	1000129	+	GTTCTTGAATAAATTTGGCTCCGAGTT	AAACAGATTCTAGAGCTTTGCTCAACA	+
SEN1	YLR430W.line.82.chrXII.993434.1000129_tile_5	Saccharomyces cerevisiae	R64-2-1	chrXII	993434	1000129	-	TCTGATTCAATGCGTTGTGTGCCTCA	AGTCAACAGTACTGTTTCAAATTCATC	-
SEN1	YLR430W.line.82.chrXII.993434.1000129_tile_6	Saccharomyces cerevisiae	R64-2-1	chrXII	993434	1000129	+	TGATAGTACCGTCAAATACTGCCGTAG	TCTGGTGTGTTTGCTAATTTCCAAACT	+
SEN1	YLR430W.line.82.chrXII.993434.1000129_tile_7	Saccharomyces cerevisiae	R64-2-1	chrXII	993434	1000129	-	CTACCAAGGAATCATCCACTTTCACAT	ATCGGGTCTACAAATGCACTCACTACG	-
SEN1	YLR430W.line.82.chrXII.993434.1000129_tile_8	Saccharomyces cerevisiae	R64-2-1	chrXII	993434	1000129	+	AGCACGTCTGATTTAGCACATGAAAAG	AGCTCAGCCTAAAATAACATCTTTTGG	+
SEN1	YLR430W.line.82.chrXII.993434.1000129_tile_9	Saccharomyces cerevisiae	R64-2-1	chrXII	993434	1000129	-	AGAGGGTTCATATCAACATTTAATCTCTT	CTCTTGGTCTCCCAGTTATTGAAGAAG	-
SEN1	YLR430W.line.82.chrXII.993434.1000129_tile_10	Saccharomyces cerevisiae	R64-2-1	chrXII	993434	1000129	+	GGCTAAACAGGAGTTAGAACATATGAG	AAGGTTGTCCAGTGATGATTTCAAGAA	+
SEN1	YLR430W.line.82.chrXII.993434.1000129_tile_11	Saccharomyces cerevisiae	R64-2-1	chrXII	993434	1000129	-	CAGGTGGACCCTGAATTAAAGAAAAACC	TGTCTGGTCGAAAATCGGGTAAATAAG	-
SEN1	YLR430W.line.82.chrXII.993434.1000129_tile_12	Saccharomyces cerevisiae	R64-2-1	chrXII	993434	1000129	+	GGCCATCGTTAATTCGGTATCTAAAGA	TTACGAAATCAGAACAGATCCGGAACT	+
SEN1	YLR430W.line.82.chrXII.993434.1000129_tile_13	Saccharomyces cerevisiae	R64-2-1	chrXII	993434	1000129	-	TCCCTCCATACCTGAGAGGAATAATTG	TCCTTTCACCTATCCTTTTATCCACAA	-
SEN1	YLR430W.line.82.chrXII.993434.1000129_tile_14	Saccharomyces cerevisiae	R64-2-1	chrXII	993434	1000129	+	GAAGCATGTCAATGTACCGAACTTTCT	ACAAATATGGAGGAAATACGTGTTGCC	+
SEN1	YLR430W.line.82.chrXII.993434.1000129_tile_15	Saccharomyces cerevisiae	R64-2-1	chrXII	993434	1000129	-	CCATAACTTGCTTTTAGCCAGAGACCTT	TAAGACATAGTCTTCGCATTTTGTTCT	-
SEN1	YLR430W.line.82.chrXII.993434.1000129_tile_16	Saccharomyces cerevisiae	R64-2-1	chrXII	993434	1000129	+	AGACAAGTATTTGGGTTTTGGGACATC	AGCACCTCATCTGGTACAAAGAAAAAG	+
SEN1	YLR430W.line.82.chrXII.993434.1000129_tile_17	Saccharomyces cerevisiae	R64-2-1	chrXII	993434	1000129	-	CTGTTGTTACGACCATTTGCTTCACTT	GGCGATTCTGCCTTCTTGTTATTCTTT	-
SEN1	YLR430W.line.82.chrXII.993434.1000129_tile_18	Saccharomyces cerevisiae	R64-2-1	chrXII	993434	1000129	+	CGTCAATCTCCGATTCTTCATTAATGA	ACCACAATCTTCAGCATTCAAAGGACC	+
SEN1	YLR430W.line.82.chrXII.993434.1000129_tile_19	Saccharomyces cerevisiae	R64-2-1	chrXII	993434	1000129	-	GGCATTTCTGAAAGTGTAGTAAACGCT	GCGGATGGGGGTTTAAATCATATGGAT	-
LSM3	YLR438C-A.line.83.chrXII.1013909.1014178_tile_1	Saccharomyces cerevisiae	R64-2-1	chrXII	1013909	1014178	-	GAACAAACAAGAGGCAGGATGTTTCCA	AGAGGAGGAGAAAACAAAGGGAAACA	-
RSE1	YML049C.line.84.chrXIII.174220.178305_tile_1	Saccharomyces cerevisiae	R64-2-1	chrXIII	174220	178305	-	CCAAGGGGAATGTTTTTATGATGGGAA	TTTACAGTAATAATACCAAGTATAAAGGCG	-
RSE1	YML049C.line.84.chrXIII.174220.178305_tile_2	Saccharomyces cerevisiae	R64-2-1	chrXIII	174220	178305	+	TCCGCCTCAGCCATTATATTCTCAATG	TACGTACGGAATAAATACATTCCCCGC	+
RSE1	YML049C.line.84.chrXIII.174220.178305_tile_3	Saccharomyces cerevisiae	R64-2-1	chrXIII	174220	178305	-	CCGCTGCTATAATAGATTTCACAAGAC	ATGACTCTGTAAAACGCCATGTGACGG	-
RSE1	YML049C.line.84.chrXIII.174220.178305_tile_4	Saccharomyces cerevisiae	R64-2-1	chrXIII	174220	178305	+	CCAGCACAAATGATCAAATGATCAGCT	GTTGATTGCAACATCTGCGTTAACAAA	+
RSE1	YML049C.line.84.chrXIII.174220.178305_tile_5	Saccharomyces cerevisiae	R64-2-1	chrXIII	174220	178305	-	GTGAAAAGATTTCTGACATGATAATGGT	GTGTTTGTTCAATATCGAGCTCAGGAC	-
RSE1	YML049C.line.84.chrXIII.174220.178305_tile_6	Saccharomyces cerevisiae	R64-2-1	chrXIII	174220	178305	+	ATTAAGCTGTCCTATTGAGGAATCTCT	TGGATAATAGAGTGTGAGCCCATTAGG	+
RSE1	YML049C.line.84.chrXIII.174220.178305_tile_7	Saccharomyces cerevisiae	R64-2-1	chrXIII	174220	178305	-	CGCTAGTTTTCGAACCATCCATAAAGT	GTATGCACCGCAGAACTAAGACATATC	-
RSE1	YML049C.line.84.chrXIII.174220.178305_tile_8	Saccharomyces cerevisiae	R64-2-1	chrXIII	174220	178305	+	TGTTGCGATAATATGCTCAAATTCTGC	TTCAGGCTGAAAAATCCGTTCATATCC	+
RSE1	YML049C.line.84.chrXIII.174220.178305_tile_9	Saccharomyces cerevisiae	R64-2-1	chrXIII	174220	178305	-	GAGGATTTCGTCTCCATTGGAAATCAT	GTGGAAATACCCAAAAGATCTATCACA	-
RSE1	YML049C.line.84.chrXIII.174220.178305_tile_10	Saccharomyces cerevisiae	R64-2-1	chrXIII	174220	178305	+	CATATCCAGCGTTACCATATGGGGTCT	TGGCAATAAGCTTTAGTTCCCCATCTG	+
RSE1	YML049C.line.84.chrXIII.174220.178305_tile_11	Saccharomyces cerevisiae	R64-2-1	chrXIII	174220	178305	-	GCCCCTCTCTAAAAAGGAAAACAATGG	GTTTCAAAACCTGTTTGCGACGATAAC	-
PRP39	YML046W.line.85.chrXIII.181474.183363_tile_1	Saccharomyces cerevisiae	R64-2-1	chrXIII	181474	183363	-	CGTTCGGGTTATTAACACACAACACAT	CGAAAGACGGATTGCCAAGTATCCAATA	-
PRP39	YML046W.line.85.chrXIII.181474.183363_tile_2	Saccharomyces cerevisiae	R64-2-1	chrXIII	181474	183363	+	TCTCTGGAGTTATGGTGTGATTATTTG	GGGCCAAGTGTTAAATGATGATTTGGA	+
PRP39	YML046W.line.85.chrXIII.181474.183363_tile_3	Saccharomyces cerevisiae	R64-2-1	chrXIII	181474	183363	-	GGTACTCCGTCATAAGTAATATGTCGT	GGTTGAAGAAGGGCTGTTTGATTTTCG	-
PRP39	YML046W.line.85.chrXIII.181474.183363_tile_4	Saccharomyces cerevisiae	R64-2-1	chrXIII	181474	183363	+	GTATCGCGTTATTTAAAGATTTGGCCC	AAATTCATTAGGGAGCTTGGGGTAGAA	+
PRP39	YML046W.line.85.chrXIII.181474.183363_tile_5	Saccharomyces cerevisiae	R64-2-1	chrXIII	181474	183363	-	CTTGACCTGATTAATTTTCTCCAAGTT	TTCAGCTTGGTAAAATTTACATTACTCTT	-
PRP39	YML046W.line.85.chrXIII.181474.183363_tile_6	Saccharomyces cerevisiae	R64-2-1	chrXIII	181474	183363	+	AAAGCCCATCAGTTTGCCTAATTTTAG	AATCGCAGAAATCAAATAATATGAAGAGT	+
STO1	YMR125W.line.86.chrXIII.517539.520446_tile_1	Saccharomyces cerevisiae	R64-2-1	chrXIII	517539	520446	-	CATGCGAGGCCTAAAATCACGGTAATT	AAATATATTTAAAATGCAATTGTAGCCCC	-
STO1	YMR125W.line.86.chrXIII.517539.520446_tile_2	Saccharomyces cerevisiae	R64-2-1	chrXIII	517539	520446	+	TTTACCGTTAGACTTCGATGAAGATGA	TCAAGAGTACGTCAAATGAAACTGGGC	+
STO1	YMR125W.line.86.chrXIII.517539.520446_tile_3	Saccharomyces cerevisiae	R64-2-1	chrXIII	517539	520446	-	CGACTCGGACAAGTTCTACCATTTCAT	TTCATCATTATATGTTTGCTTGCACCA	-
STO1	YMR125W.line.86.chrXIII.517539.520446_tile_4	Saccharomyces cerevisiae	R64-2-1	chrXIII	517539	520446	+	TTAAGAGAATACAATGGTGAACCTCCA	TAGAAAGGAAGTAGCTAGACAAGTGAT	+
STO1	YMR125W.line.86.chrXIII.517539.520446_tile_5	Saccharomyces cerevisiae	R64-2-1	chrXIII	517539	520446	-	ACTTGCCAAATTTGATCGAATCGTCT	TGAATTCTAAACTTTCCACCAGATCAA	-
STO1	YMR125W.line.86.chrXIII.517539.520446_tile_6	Saccharomyces cerevisiae	R64-2-1	chrXIII	517539	520446	+	ATTTTTCTTGGAAGTGGAATGAATGGG	AATTTCCGACTTTAACAGATTTGTTATCA	+
STO1	YMR125W.line.86.chrXIII.517539.520446_tile_7	Saccharomyces cerevisiae	R64-2-1	chrXIII	517539	520446	-	CGTTCTCTTCCGAGATTTGTTGAGATA	TGGAACCATACTCATTCTTTAACTCAC	-
STO1	YMR125W.line.86.chrXIII.517539.520446_tile_8	Saccharomyces cerevisiae	R64-2-1	chrXIII	517539	520446	+	ACAGCAATTGAAGCGGTCTTTAGAAAT	AGGATGGACTACATTCGTTATCACTCC	+
CEF1	YMR213W.line.87.chrXIII.693381.695153_tile_1	Saccharomyces cerevisiae	R64-2-1	chrXIII	693381	695153	-	GCGTTAGGATTAATATCCCCGGCTTTC	TGAAATGCTAGTATAGTCCTCTTAGAAATG	-
CEF1	YMR213W.line.87.chrXIII.693381.695153_tile_2	Saccharomyces cerevisiae	R64-2-1	chrXIII	693381	695153	+	CTGCGTTAAGTACAGGAGTTACTGACT	AGGTTTGGATGGTAATAAGGATAAGCC	+
CEF1	YMR213W.line.87.chrXIII.693381.695153_tile_3	Saccharomyces cerevisiae	R64-2-1	chrXIII	693381	695153	-	ACAATTTCGAAATCGTTCTTGGGACT	TTCTGTTGACTTTTCTCTCAAACTGCT	-
CEF1	YMR213W.line.87.chrXIII.693381.695153_tile_4	Saccharomyces cerevisiae	R64-2-1	chrXIII	693381	695153	+	TTTAGTGCAAATGTTCGCATCTTTGCC	AATTCAAAACAGCAATGCCCCCAACTG	+
CEF1	YMR213W.line.87.chrXIII.693381.695153_tile_5	Saccharomyces cerevisiae	R64-2-1	chrXIII	693381	695153	-	CCAACTTGGCAAGAAAACGTTCTAACT	TATTTTCATGGAAGTGCGCCCTTGGGT	-
CUS1	YMR240C.line.88.chrXIII.749930.751240_tile_1	Saccharomyces cerevisiae	R64-2-1	chrXIII	749930	751240	-	GGTCAACTACCACCATGGTGTATGAAG	ACTAAATATCGCATAGGTACTTCAGTTTTA	-
CUS1	YMR240C.line.88.chrXIII.749930.751240_tile_2	Saccharomyces cerevisiae	R64-2-1	chrXIII	749930	751240	+	ATCCCGTAGGTAATCCAATGTCTTTCA	TTTACCTAACAGAGAACGGCCAGATAG	+
CUS1	YMR240C.line.88.chrXIII.749930.751240_tile_3	Saccharomyces cerevisiae	R64-2-1	chrXIII	749930	751240	-	GTGGATGCGAAGTTAGAAAAAGAGTTC	GACCTTTTGAACTTCCTGACATTATCA	-
CUS1	YMR240C.line.88.chrXIII.749930.751240_tile_4	Saccharomyces cerevisiae	R64-2-1	chrXIII	749930	751240	+	GCACTTGAAATCGTTGTAAAACGTCTT	TTTCTTTCTCAAGACCTAGGTCCTGTC	+
PRP24	YMR268C.line.89.chrXIII.802888.804222_tile_1	Saccharomyces cerevisiae	R64-2-1	chrXIII	802888	804222	-	CTTTCAGATAAGGTGTCACCAAGCTTA	TAACCGAACCGGAGAAAGACGAACTT	-
PRP24	YMR268C.line.89.chrXIII.802888.804222_tile_2	Saccharomyces cerevisiae	R64-2-1	chrXIII	802888	804222	+	GTATTTCTTCCTGAAGAAATTGGCAGA	GGCAGAATCGGTCCGTTTCGACTTTT	+
PRP24	YMR268C.line.89.chrXIII.802888.804222_tile_3	Saccharomyces cerevisiae	R64-2-1	chrXIII	802888	804222	-	CCATTATACACGTTGATGTTGCGGATT	CACTAGAGGGGCGAGAGATTATGATAC	-
PRP24	YMR268C.line.89.chrXIII.802888.804222_tile_4	Saccharomyces cerevisiae	R64-2-1	chrXIII	802888	804222	+	CGTGCAAAACGAAAGTTCTTCTTCAGC	TGATGCACTCTACAATTCATTGTCATG	+
HSH155	YMR288W.line.90.chrXIII.845571.848486_tile_1	Saccharomyces cerevisiae	R64-2-1	chrXIII	845571	848486	-	TCCTTCTACATTAACCAAAGCACTATC	GACAGGTCCTGGCTTTCTATGTTTATT	-
HSH155	YMR288W.line.90.chrXIII.845571.848486_tile_2	Saccharomyces cerevisiae	R64-2-1	chrXIII	845571	848486	+	ATCTTCAACAGCGGTCAAAGAAAACTC	AAATACTTGTAGTAGCTGCCCCATTGC	+
HSH155	YMR288W.line.90.chrXIII.845571.848486_tile_3	Saccharomyces cerevisiae	R64-2-1	chrXIII	845571	848486	-	GAACGTGATCATCCATTAGGCAGTCTT	GTGAACGTAAGGTTTTGTTAAATCTCC	-
HSH155	YMR288W.line.90.chrXIII.845571.848486_tile_4	Saccharomyces cerevisiae	R64-2-1	chrXIII	845571	848486	+	CATCTTACTGGGCTGATGAGTTGTATC	CAGACGAGTGGCATTGGATAGACCATTA	+
HSH155	YMR288W.line.90.chrXIII.845571.848486_tile_5	Saccharomyces cerevisiae	R64-2-1	chrXIII	845571	848486	-	CTGGTATTAGTATGGCACATAGATCTGC	CCCAAAATTTTTGAAAGAATTCTGGCG	-
HSH155	YMR288W.line.90.chrXIII.845571.848486_tile_6	Saccharomyces cerevisiae	R64-2-1	chrXIII	845571	848486	+	TAAAACTCCCTTGGTTCGTCAACATGC	TTGGATTCATTGCTGAAGCAATTGGAC	+
HSH155	YMR288W.line.90.chrXIII.845571.848486_tile_7	Saccharomyces cerevisiae	R64-2-1	chrXIII	845571	848486	-	TGAATGAAGGCATCTTCGTGACCTGT	CGTGGCATTTGCTGATCTTCTTATTTC	-
HSH155	YMR288W.line.90.chrXIII.845571.848486_tile_8	Saccharomyces cerevisiae	R64-2-1	chrXIII	845571	848486	+	AACCCACTTAGCTTTAAACTGTTCAGG	ACACACCTATATCATCACGTCACGATG	+
CUS2	YNL286W.line.91.chrXIV.95223.96080_tile_1	Saccharomyces cerevisiae	R64-2-1	chrXIV	95223	96080	-	GTTTTGAAATTGGGCTCTTTCGACCC	GCTGTCAAACAGTAATGTTGGTAACGG	-
CUS2	YNL286W.line.91.chrXIV.95223.96080_tile_2	Saccharomyces cerevisiae	R64-2-1	chrXIV	95223	96080	+	GAGTCGATCTTCCTGGGAAAACAGATC	GACGTTATTTTGATGGGCAAAAGTTGC	+
CUS2	YNL286W.line.91.chrXIV.95223.96080_tile_3	Saccharomyces cerevisiae	R64-2-1	chrXIV	95223	96080	-	GGTGGTGATATAGTCGCCATCACTTAT	GGTCATGATTTTGCAACATTGCAATGC	-
CWC25	YNL245C.line.92.chrXIV.186346.186885_tile_1	Saccharomyces cerevisiae	R64-2-1	chrXIV	186346	186885	-	CTAAATGAACTGCTGAACGAATCGAGC	CTTTCCTTTTCTTAGAGCTTGGTTCCT	-
CWC25	YNL245C.line.92.chrXIV.186346.186885_tile_2	Saccharomyces cerevisiae	R64-2-1	chrXIV	186346	186885	+	CATTCTTGAGAGTCTCCGGCTTATCCT	TGCACTTGGACTTAAATAACTAAACAG	+
SSU72	YNL222W.line.93.chrXIV.229094.229714_tile_1	Saccharomyces cerevisiae	R64-2-1	chrXIV	229094	229714	-	TCAAATCTTCACAAACGGCATCAAAAC	TTGGACTTCGACACTAGTTTATACCAC	-
SSU72	YNL222W.line.93.chrXIV.229094.229714_tile_2	Saccharomyces cerevisiae	R64-2-1	chrXIV	229094	229714	+	GACTTCGTTTTCACTTGTGAAGAGAGA	ACTTTCACAAGTCTTCGATAGCTTCCT	+
U1	snR19.line.94.chrXIV.230105.230672_tile_1	Saccharomyces cerevisiae	R64-2-1	chrXIV	230105	230672	-	CTGATTTTTGGGGCCCTTTGTTTCTTC	GTCCTATATCTGGTGATGTGTTTTGGA	-
U1	snR19.line.94.chrXIV.230105.230672_tile_2	Saccharomyces cerevisiae	R64-2-1	chrXIV	230105	230672	+	TGAATTTGGTGTCAAACTTCTCCAGGC	TCTCTATTTATACGTCTTGCCAATGGA	+
LSM7	YNL147W.line.95.chrXIV.350940.351383_tile_1	Saccharomyces cerevisiae	R64-2-1	chrXIV	350940	351383	-	CTTCGGCGGAACTTAAAGAGACCAAAA	TTTTTGGTTAATGTTCTGTGTAGTAAACA	-
LSM7	YNL147W.line.95.chrXIV.350940.351383_tile_2	Saccharomyces cerevisiae	R64-2-1	chrXIV	350940	351383	+	CTAGGTTTGACCGTCATAAGAGGTACT	CCTTTCGTATTTGTCCAGTATGAGCAA	+
YSF3	YNL138W-A.line.96.chrXIV.366033.366412_tile_1	Saccharomyces cerevisiae	R64-2-1	chrXIV	366033	366412	-	ACGTCCTACCTCTCTTCTCGTAAGTAG	TCTTTTCTTAATTTCACTGTTTCGAATTG	-
YSF3	YNL138W-A.line.96.chrXIV.366033.366412_tile_2	Saccharomyces cerevisiae	R64-2-1	chrXIV	366033	366412	+	TGAAATCCATGTCCCCTGGCTATAAAG	TCATGCCTGACTCTAAGTACACAATGC	+
PRP2	YNR011C.line.97.chrXIV.644320.646950_tile_1	Saccharomyces cerevisiae	R64-2-1	chrXIV	644320	646950	-	GATTAGTTGAAAAGAACGACCAAGCCA	TTTTTGACAGGTGTATGTGTATTGCT	-
PRP2	YNR011C.line.97.chrXIV.644320.646950_tile_2	Saccharomyces cerevisiae	R64-2-1	chrXIV	644320	646950	+	TAGCCCGCTATATTGCCTATCTTCATC	AAACTCGCACATCATTTTACCTAACCG	+
PRP2	YNR011C.line.97.chrXIV.644320.646950_tile_3	Saccharomyces cerevisiae	R64-2-1	chrXIV	644320	646950	-	CCTGGATTTGTTAAGGAAAATTCGTAC	CTTGTGAACCTGAATTTGCAAAAGTGC	-
PRP2	YNR011C.line.97.chrXIV.644320.646950_tile_4	Saccharomyces cerevisiae	R64-2-1	chrXIV	644320	646950	+	AAAGTTGGGTCATTCCAGTGGAGGGTA	GCTGTAATGTGTAGTGGATATCTACAGG	+
PRP2	YNR011C.line.97.chrXIV.644320.646950_tile_5	Saccharomyces cerevisiae	R64-2-1	chrXIV	644320	646950	-	GCTGCAAGAGTAGCAGATGAAATGAAT	GGAGGCAAACTATATACATGCCGCTAT	-
PRP2	YNR011C.line.97.chrXIV.644320.646950_tile_6	Saccharomyces cerevisiae	R64-2-1	chrXIV	644320	646950	+	GATAACCCACTTCCTTCCCAAGCACAA	GCCTTCCAATGTTATATCATCAGGGTG	+
PRP2	YNR011C.line.97.chrXIV.644320.646950_tile_7	Saccharomyces cerevisiae	R64-2-1	chrXIV	644320	646950	-	GGATAAGAACTCTGCCTTGCAGCTAAA	CTGACAAGTACGATTATGTGTTCGACA	-
PRP2	YNR011C.line.97.chrXIV.644320.646950_tile_8	Saccharomyces cerevisiae	R64-2-1	chrXIV	644320	646950	+	AACTTTATTGGGGTCATAGCGTGATCG	TTCCCACTTGTTCTCACTATTTCCTCT	+
SPP2	YOR148C.line.98.chrXV.608640.609197_tile_1	Saccharomyces cerevisiae	R64-2-1	chrXV	608640	609197	-	GCTGAGTGAAAATGCGGATACCAAAAA	TCCGAAGGAGGTATTTTTAGTTTGGCT	-
SPP2	YOR148C.line.98.chrXV.608640.609197_tile_2	Saccharomyces cerevisiae	R64-2-1	chrXV	608640	609197	+	GACATATTCCACCAGAGGAGCATCGTT	AACAAATGATAGCGCCAGATCATTGAG	+
SME1	YOR159C.line.99.chrXV.633282.633566_tile_1	Saccharomyces cerevisiae	R64-2-1	chrXV	633282	633566	-	GCCTGAGCATCTAACAGAGAAATAGAA	AGAAAAAGGGGAACGAGAGAAATAGAC	-
DED1	YOR204W.line.100.chrXV.722911.724725_tile_1	Saccharomyces cerevisiae	R64-2-1	chrXV	722911	724725	-	CATCGTAGTTATCGAAGTTAATACCAGAA	ATATGAAATGCTTTTCTTGTTGTTCTTAC	-
DED1	YOR204W.line.100.chrXV.722911.724725_tile_2	Saccharomyces cerevisiae	R64-2-1	chrXV	722911	724725	+	GTGTCCCCGAGGATCCAAATTTCCAAT	GGCCACCCAAATTTTCGATGAAGCCAA	+
DED1	YOR204W.line.100.chrXV.722911.724725_tile_3	Saccharomyces cerevisiae	R64-2-1	chrXV	722911	724725	-	GTAGAACCGACTCTACCAACAGACAAA	ACTCTCTAGTTGGAGCCATAATGACAG	-
DED1	YOR204W.line.100.chrXV.722911.724725_tile_4	Saccharomyces cerevisiae	R64-2-1	chrXV	722911	724725	+	CCCGTGATTTCTTAAGTGACTACATCT	CGTCCATAGAATTGGTAGAACTGGTCG	+
DED1	YOR204W.line.100.chrXV.722911.724725_tile_5	Saccharomyces cerevisiae	R64-2-1	chrXV	722911	724725	-	GCTAGAGCAGAAAACGAAGAATCCTCA	AATCATCGACATCACTTGGTAAATCGT	-
DED1	YOR204W.line.100.chrXV.722911.724725_tile_6	Saccharomyces cerevisiae	R64-2-1	chrXV	722911	724725	+	CTTGGTGGTGATTTCAGACAAACTAGG	CTTTAACCGATCTATTCATTGGACTGA	+
SNU66	YOR308C.line.101.chrXV.894624.896387_tile_1	Saccharomyces cerevisiae	R64-2-1	chrXV	894624	896387	-	CGTCGATTTGAAACCAGGAAAGGATGT	ATCAGCAAATTCTACTAGCCCCAGCT	-
SNU66	YOR308C.line.101.chrXV.894624.896387_tile_2	Saccharomyces cerevisiae	R64-2-1	chrXV	894624	896387	+	ATCCCTTCGAAGTGATTCACTATTATT	GTCGCTTCTCTTCGTCTCTTGCCTTTT	+
SNU66	YOR308C.line.101.chrXV.894624.896387_tile_3	Saccharomyces cerevisiae	R64-2-1	chrXV	894624	896387	-	GAAGAAGAAGGAGAGAAACACTCAATT	CACTGAAAGCATTTTGAAAATGCGTGA	-
SNU66	YOR308C.line.101.chrXV.894624.896387_tile_4	Saccharomyces cerevisiae	R64-2-1	chrXV	894624	896387	+	CTGCTCCGATGATTAGATGTGTAGTTG	GCCATGAACTGTCGTCATTTACATTAG	+
SNU66	YOR308C.line.101.chrXV.894624.896387_tile_5	Saccharomyces cerevisiae	R64-2-1	chrXV	894624	896387	-	CAAAGGATGAGATGGTGCAATCGTTAC	AGAAAACATGGATGCAATTCCTTCCTC	-
HSH49	YOR319W.line.102.chrXV.912822.913463_tile_1	Saccharomyces cerevisiae	R64-2-1	chrXV	912822	913463	-	CGGGTTCCCTTATGAGCTTACCAAATT	TGTTAATCTTAGAATGATTGCGCTGTT	-
HSH49	YOR319W.line.102.chrXV.912822.913463_tile_2	Saccharomyces cerevisiae	R64-2-1	chrXV	912822	913463	+	AGCGACCAATTAGTGAAAATTTTCAAT	TTCACTTCTCCTCATAATCAAACGAGGC	+
LEA1	YPL213W.line.103.chrXVI.150614.151330_tile_1	Saccharomyces cerevisiae	R64-2-1	chrXVI	150614	151330	+	AGGACTTGGAAAATATCAGTTTTTATAAGC	CCCAGGACGTTGAAGAATCTAACTT	+
LEA1	YPL213W.line.103.chrXVI.150614.151330_tile_2	Saccharomyces cerevisiae	R64-2-1	chrXVI	150614	151330	-	TTTTTAAGTCATTGAACAGTCGCACTA	GCTCTACGCAACCTTTGAAGATCTTCA	-
LEA1	YPL213W.line.103.chrXVI.150614.151330_tile_3	Saccharomyces cerevisiae	R64-2-1	chrXVI	150614	151330	+	ACTCTCTGGTGGTGTTTAATCTTTTGG	ATTTATCGGCAGTTTCTTCTCCCTGTG	+
CBC2	YPL178W.line.104.chrXVI.212158.212784_tile_1	Saccharomyces cerevisiae	R64-2-1	chrXVI	212158	212784	-	CGACCAAACTGTCTTCCATCTTCAAA	GGTATATTAATGGATGCAACTTTTATTCG	-
CBC2	YPL178W.line.104.chrXVI.212158.212784_tile_2	Saccharomyces cerevisiae	R64-2-1	chrXVI	212158	212784	+	GACAATTACCATTGATCTAGATCCTGG	TCAGTGTAACATAATAGACGTAACACG	+
PRP46	YPL151C.line.105.chrXVI.266180.267535_tile_1	Saccharomyces cerevisiae	R64-2-1	chrXVI	266180	267535	-	ACTGATGACATCAGATCATGGGGATTA	GGGAGTAGATGGAAAAAGTACGTACCC	-
PRP46	YPL151C.line.105.chrXVI.266180.267535_tile_2	Saccharomyces cerevisiae	R64-2-1	chrXVI	266180	267535	+	CAAAATTGGTGAGTAAAGACCCCTCTG	TTGACCGTCTTATCTTCACTAACAGAA	+
PRP46	YPL151C.line.105.chrXVI.266180.267535_tile_3	Saccharomyces cerevisiae	R64-2-1	chrXVI	266180	267535	-	GCAGCATGTTCCTACAGATTTTTCAGA	TGCTGGGACCTAGAGAAAAACCAAATT	-
PRP46	YPL151C.line.105.chrXVI.266180.267535_tile_4	Saccharomyces cerevisiae	R64-2-1	chrXVI	266180	267535	+	TTTCTTGCTAATCACTGCTTGTGATGC	TGATGAAGAATTTTGAGCACCCTTACT	+
CWC27	YPL064C.line.106.chrXVI.428711.429616_tile_1	Saccharomyces cerevisiae	R64-2-1	chrXVI	428711	429616	-	AAAGAACAAGAGCCGGCAAAGAA	GAAACGCTTGTGTACTTATATATGTTATCA	-
CWC27	YPL064C.line.106.chrXVI.428711.429616_tile_2	Saccharomyces cerevisiae	R64-2-1	chrXVI	428711	429616	+	ACCATCTTTACTTTTGCTGATTTCACAAG	TTGCATTAAACATTAGCCACTGTGTTGG	+
CWC27	YPL064C.line.106.chrXVI.428711.429616_tile_3	Saccharomyces cerevisiae	R64-2-1	chrXVI	428711	429616	-	CCGTTCCGATTAATCCTGACGTTATGT	TAGTACTGGTGAGTACCGTACAGTTGC	-
DIB1	YPR082C.line.107.chrXVI.704225.704656_tile_1	Saccharomyces cerevisiae	R64-2-1	chrXVI	704225	704656	-	TCAGGCTATTGTTACCGAGACTAAACG	TCATAATAACTATGTAGGCTAGGCGCA	-
DIB1	YPR082C.line.107.chrXVI.704225.704656_tile_2	Saccharomyces cerevisiae	R64-2-1	chrXVI	704225	704656	+	TTTGCGACCAAAACGAATGACAACAAG	CCATCGTTAGCAAATTTCATAGGGCTG	+
RDS3	YPR094W.line.108.chrXVI.720637.720960_tile_1	Saccharomyces cerevisiae	R64-2-1	chrXVI	720637	720960	-	AGGGGAAGAAAATAGTACCATGGGTTA	TTTTTGTTGGAGGCTTGTATGTGT	-
SNT309	YPR101W.line.109.chrXVI.730492.731019_tile_1	Saccharomyces cerevisiae	R64-2-1	chrXVI	730492	731019	-	CATTGATTCGATACCGTTTGCGGTAGA	ATCTAAACGTTGAATACCGTACGGTTG	-
SNT309	YPR101W.line.109.chrXVI.730492.731019_tile_2	Saccharomyces cerevisiae	R64-2-1	chrXVI	730492	731019	+	AAAACATCAGGAAATAGTTTTGGATACAC	CATCAGCATCGTACTTTTGCTTGAACC	+
URN1	YPR152C.line.110.chrXVI.832061.833458_tile_1	Saccharomyces cerevisiae	R64-2-1	chrXVI	832061	833458	-	ATCAAGGAGTATATACCGTCGAAGCG	AAGGGCAGACCAGGGGAGCAAAGAG	-
URN1	YPR152C.line.110.chrXVI.832061.833458_tile_2	Saccharomyces cerevisiae	R64-2-1	chrXVI	832061	833458	+	CAGTTGGGAAACGAATTTGTCTTGGTC	TACGATTCAGATCATCGATAATGCTGA	+
URN1	YPR152C.line.110.chrXVI.832061.833458_tile_3	Saccharomyces cerevisiae	R64-2-1	chrXVI	832061	833458	-	ATGACATCAGTCAAGAGGACGACAGCA	TGATACAGATGACATTGACGAGCGTAA	-
URN1	YPR152C.line.110.chrXVI.832061.833458_tile_4	Saccharomyces cerevisiae	R64-2-1	chrXVI	832061	833458	+	TCTAACGACTCGATTAATGAGCGACAC	TGTTTTCTCTTTCATTGCCGAAGAAAA	+
PRP4	YPR178W.line.111.chrXVI.892332.893729_tile_1	Saccharomyces cerevisiae	R64-2-1	chrXVI	892332	893729	-	TCAAAAATCTTCTCGCAAAAATGAGCT	TTCCGTTCAACAAGGTAATAGTACTAG	-
PRP4	YPR178W.line.111.chrXVI.892332.893729_tile_2	Saccharomyces cerevisiae	R64-2-1	chrXVI	892332	893729	+	GGACTTCTTCACTCCAGCAACATCT	CAATACTCAAACGAAGAGGGCGGCCTT	+
PRP4	YPR178W.line.111.chrXVI.892332.893729_tile_3	Saccharomyces cerevisiae	R64-2-1	chrXVI	892332	893729	-	CTTCATCCCGTTTTCTGATGTCCCAA	AAGTTTTTGATGAGCCCGTCTTCTGCG	-
PRP4	YPR178W.line.111.chrXVI.892332.893729_tile_4	Saccharomyces cerevisiae	R64-2-1	chrXVI	892332	893729	+	CTGGTGGTGGTGATGGAATCATTAATG	TTACCATTTTGAGTACGAACTCGTGGA	+
SMX3	YPR182W.line.112.chrXVI.900194.900454_tile_1	Saccharomyces cerevisiae	R64-2-1	chrXVI	900194	900454	-	GAAATCCAGAGGCAGGAATAAGGAAGA	GTCTTGTTGTGTTGTGACGTAGTGTGT	-
